# Supplementary material for: Genetic variation in offspring indirectly influences the quality of maternal behaviour in mice
Source: eLife. 2015 Dec 23;4:e11814. doi: 10.7554/eLife.11814 (PMC4758942; doi:10.7554/eLife.11814)
Supplement: Figure 2—source data 1. — DOI: http://dx.doi.org/10.7554/eLife.11814.005 [file elife-11814-fig2-data1.xlsx]

## Sheet: Sheet1
BXD lines	B6 maternal nestbuilding behaviour on day 6 per pup
B6D2F1	x
D2B6F1	x
C57BL/6J	x
DBA/2J	x
1	0.25
2	x
5	x
6	x
8	x
9	x
11	3
12	6
13	x
14	3.25
15	x
16	x
18	x
19	x
20	x
21	x
22	x
23	x
24	0.375
24a	x
25	x
27	x
28	x
29	x
30	x
31	x
32	x
33	x
34	2
35	x
36	x
37	x
38	3.95
39	2.08333
40	1.11111
41	x
42	x
43	1.43056
44	2.57143
45	2
48	x
48a (96)	1.1
49	3.66667
50	x
51	3.18519
52	x
53	x
54	x
55	7
56	x
59	x
60	4.51667
61	1.16667
62	2.91667
63	x
64	1.2037
65	x
65a (97)	x
65b(92)	x
66	2.5
67	9.75
68	0.333333
69	0.442857
70	1.33929
71	3.30556
72	x
73	2.7
73a(80)	3.48333
73b (103)	4
74	1.65
75	2.57143
76	x
77	x
78	x
79	x
81	x
83	2.8
84	2.11111
85	x
86	x
87	1.1875
88	x
89	2.6
90	2.6
91	x
93	x
94	x
95	x
98	x
99	x
100	x
101	x
102	1
