# Supplementary material for: Genetic variation in offspring indirectly influences the quality of maternal behaviour in mice
Source: eLife. 2015 Dec 23;4:e11814. doi: 10.7554/eLife.11814 (PMC4758942; doi:10.7554/eLife.11814)
Supplement: Figure 3—source data 1. — DOI: http://dx.doi.org/10.7554/eLife.11814.007 [file elife-11814-fig3-data1.xlsx]

## Sheet: Sheet1
BXD lines	B6 maternal behaviour on day 14 per pup
B6D2F1	x
D2B6F1	x
C57BL/6J	x
DBA/2J	x
1	3.875
2	x
5	x
6	x
8	x
9	x
11	14
12	16.6667
13	x
14	10.5
15	x
16	x
18	x
19	x
20	x
21	x
22	x
23	x
24	x
24a	x
25	x
27	x
28	x
29	x
30	x
31	x
32	x
33	x
34	x
35	x
36	x
37	x
38	7.2
39	5.15
40	x
41	x
42	x
43	6.63889
44	2.28571
45	1.66667
48	x
48a (96)	8.3
49	5.63889
50	x
51	4.52778
52	x
53	x
54	x
55	12.5
56	x
59	x
60	9.81667
61	7.5
62	1.33333
63	x
64	7.28968
65	x
65a (97)	x
65b(92)	x
66	8.01389
67	12.625
68	13
69	6.54286
70	7.94643
71	9.59259
72	x
73	1.8
73a(80)	5.16667
73b (103)	6
74	6.04167
75	11.9643
76	x
77	x
78	x
79	x
81	x
83	22.6667
84	8.33333
85	x
86	x
87	6.25
88	x
89	8.6
90	9.8
91	x
93	x
94	x
95	x
98	x
99	x
100	x
101	x
102	6.33333
