# Supplementary material for: Genetic variation in offspring indirectly influences the quality of maternal behaviour in mice
Source: eLife. 2015 Dec 23;4:e11814. doi: 10.7554/eLife.11814 (PMC4758942; doi:10.7554/eLife.11814)
Supplement: Figure 4—source data 1. — DOI: http://dx.doi.org/10.7554/eLife.11814.009 [file elife-11814-fig4-data1.xlsx]

## Sheet: Sheet1
BXD lines	B6 offspring growth in the second postnatal week per pup
B6D2F1	x
D2B6F1	x
C57BL/6J	x
DBA/2J	x
1	1.70638
2	x
5	x
6	x
8	x
9	x
11	1.964
12	1.505
13	x
14	2.606
15	x
16	x
18	x
19	x
20	x
21	x
22	x
23	x
24	1.77633
24a	x
25	x
27	x
28	x
29	x
30	x
31	x
32	1.21
33	x
34	1.7685
35	x
36	x
37	x
38	0.810111
39	1.80619
40	1.62917
41	x
42	x
43	1.9975
44	1.33571
45	1.65571
48	x
48a (96)	2.031
49	2.29107
50	1.08
51	1.85726
52	x
53	x
54	x
55	1.64071
56	0.856667
59	x
60	1.16125
61	2.3265
62	1.70476
63	1.00417
64	1.98278
65	x
65a (97)	x
65b(92)	x
66	2.75762
67	2.15433
68	1.77167
69	1.383
70	1.83917
71	1.64556
72	x
73	1.16929
73a(80)	x
73b (103)	x
74	1.78922
75	2.27511
76	x
77	x
78	x
79	x
81	x
83	1.61375
84	2.19
85	x
86	x
87	1.13857
88	x
89	2.354
90	1.91715
91	x
93	x
94	x
95	x
98	1.64375
99	x
100	x
101	x
102	1.96
