# Supplementary material for: Genetic variation in offspring indirectly influences the quality of maternal behaviour in mice
Source: eLife. 2015 Dec 23;4:e11814. doi: 10.7554/eLife.11814 (PMC4758942; doi:10.7554/eLife.11814)
Supplement: Figure 5—source data 1. — DOI: http://dx.doi.org/10.7554/eLife.11814.012 [file elife-11814-fig5-data1.xlsx]

## Sheet: Sheet1
BXD lines	BXD offspring short-term weight change on day 10 per pup	BXD maternal provisioning on day 10	BXD offspring solicitation on day 14	BXD maternal provisioning on day 14
B6D2F1	x	x	x	x
D2B6F1	x	x	x	x
C57BL/6J	x	x	x	x
DBA/2J	x	x	x	x
1	0.06975	-0.925	1.375	0.45
2	x	x	x	x
5	x	x	x	x
6	x	x	x	x
8	x	x	x	x
9	x	x	x	x
11	0.13	-0.38	8	-0.89
12	0.12	-1.805	7	-1.475
13	x	x	x	x
14	0.165	-0.39	2.75	-1.375
15	x	x	x	x
16	x	x	x	x
18	x	x	x	x
19	x	x	x	x
20	x	x	x	x
21	x	x	x	x
22	x	x	x	x
23	x	x	x	x
24	0.126458	1.27	x	-1.07
24a	x	x	x	x
25	x	x	x	x
27	x	x	x	x
28	x	x	x	x
29	x	x	x	x
30	x	x	x	x
31	x	x	x	x
32	0.147143	0.15	x	-0.05
33	x	x	x	x
34	0.106667	1.04	x	0.62
35	x	x	x	x
36	x	x	x	x
37	x	x	x	x
38	0.118	-0.476667	4.4	-0.216667
39	0.0833333	0.595	3.41667	-1.535
40	0.0788889	0.765	x	0.4
41	x	x	x	x
42	x	x	x	x
43	0.04875	1.51667	3.41667	0.88
44	0.0942857	1.04	3.42857	-0.82
45	0.138333	-1.39	2.66667	-0.34
48	x	x	x	x
48a (96)	0.0584444	-1.555	5.03333	-1.67
49	0.0120833	-0.01	4.55556	0.325
50	x	-0.18	x	-0.13
51	0.0628472	0.9475	4.21296	-0.055
52	x	x	x	x
53	x	x	x	x
54	x	x	x	x
55	0.105	-0.04	5	0.5
56	x	-0.22	x	1.22
59	x	x	x	x
60	0.0281667	1.25	2.13333	5.085
61	0.0791667	1.37	3	0.16
62	0.1075	0.63	2.33333	0.34
63	x	1.17	x	0.455
64	0.0730159	-0.386667	5.2123	-1.17667
65	x	x	x	x
65a (97)	x	x	x	x
65b(92)	x	x	x	x
66	0.0870833	0.606667	3.69444	0.0733333
67	0.06625	-0.38	9.125	-0.97
68	0.155	-0.54	2.5	1.51
69	0.0901429	1.61	3.4	1.425
70	0.119732	-0.426667	3.20536	-0.733333
71	0.0925	1.61667	5.5	1.49
72	x	x	x	x
73	0.133	-1.725	2.2	-0.56
73a(80)	x	x	3.99167	x
73b (103)	0.21	x	3.5	x
74	0.0676667	0.756667	4.33333	-0.00333333
75	0.00321429	1.87	3.35714	1.3
76	x	x	x	x
77	x	x	x	x
78	x	x	x	x
79	x	x	x	x
81	x	x	x	x
83	0.134	-1.34	6	-1.245
84	0.113333	-1.125	6.94444	-1.39
85	x	x	x	x
86	x	x	x	x
87	0.168125	0.195	3.1875	0.305
88	x	x	x	x
89	0.096	0.82	5.4	-1.6
90	0.206	0.965	2.2	1.665
91	x	x	x	x
93	x	x	x	x
94	x	x	x	x
95	x	x	x	x
98	x	0.7	x	0.24
99	x	x	x	x
100	x	x	x	x
101	x	x	x	x
102	0.123333	-1.18	2.66667	1.68
