# Supplementary material for: Genetic variation in offspring indirectly influences the quality of maternal behaviour in mice
Source: eLife. 2015 Dec 23;4:e11814. doi: 10.7554/eLife.11814 (PMC4758942; doi:10.7554/eLife.11814)
Supplement: Figure 6—source data 1. — DOI: http://dx.doi.org/10.7554/eLife.11814.014 [file elife-11814-fig6-data1.xlsx]

## Sheet: Sheet1
BXD lines	BXD offspring solicitation on day 10 per pup	BXD offspring weight on day 10 per pup	BXD offspring solicitation on day 14 per pup	BXD offspring weight on day 14 per pup
B6D2F1	x	X	x	X
D2B6F1	x	X	x	X
C57BL/6J	x	X	x	X
DBA/2J	x	X	x	X
1	4.5	4.75111	1.375	6.17556
2	x	X	x	X
5	x	X	x	X
6	x	X	x	X
8	x	X	x	X
9	x	X	x	X
11	4	3.65333	8	5.34333
12	3.66667	5.185	7	6.64833
13	x	X	x	X
14	0	5.68	2.75	7.285
15	x	X	x	X
16	x	X	x	X
18	x	X	x	X
19	x	X	x	X
20	x	X	x	X
21	x	X	x	X
22	x	X	x	X
23	x	X	x	X
24	3.125	4.16714	x	5.25
24a	x	X	x	X
25	x	X	x	X
27	x	X	x	X
28	x	X	x	X
29	x	X	x	X
30	x	X	x	X
31	x	X	x	X
32	x	4.31286	x	5.6
33	x	X	x	X
34	6.33333	4.54167	x	5.87
35	x	X	x	X
36	x	X	x	X
37	x	X	x	X
38	1.7	5.068	4.4	6.49
39	0	4.44	3.41667	5.75455
40	4	4.03889	x	5.45
41	x	X	x	X
42	x	X	x	X
43	2.66667	4.57591	3.41667	5.85955
44	0	3.62429	3.42857	4.75286
45	3.16667	4.13833	2.66667	5.96333
48	x	X	x	X
48a (96)	3.7	5.01429	5.03333	6.41286
49	0.444444	3.53571	4.55556	4.86143
50	x	X	x	X
51	1.83333	4.21172	4.21296	5.15793
52	x	X	x	X
53	x	X	x	X
54	x	X	x	X
55	6	3.405	5	4.875
56	x	X	x	X
59	x	X	x	X
60	2.75	4.17273	2.13333	5.62909
61	1.91667	4.5075	3	5.83917
62	0	4.37	2.33333	5.81
63	x	X	x	X
64	3.06614	3.94591	5.2123	5.03524
65	x	X	x	X
65a (97)	x	X	x	X
65b(92)	x	X	x	X
66	0	4.202	3.69444	5.0905
67	0	3.445	9.125	4.25
68	7.16667	5.56333	2.5	6.855
69	3.95714	4.83583	3.4	6.39167
70	6.00893	4.85467	3.20536	5.92333
71	1.60185	4.28471	5.5	5.62625
72	x	X	x	X
73	0.2	4.4	2.2	5.632
73a(80)	1.65	X	3.99167	X
73b (103)	4.66667	4.50167	3.5	5.995
74	4	4.52091	4.33333	6.31286
75	10.5	4.87556	3.35714	5.53222
76	x	X	x	X
77	x	X	x	X
78	x	X	x	X
79	x	X	x	X
81	x	X	x	X
83	4	4.356	6	5.94
84	10.6111	4.09667	6.94444	4.57
85	x	X	x	X
86	x	X	x	X
87	3.4375	4.74	3.1875	6.11083
88	x	X	x	X
89	9.8	4.634	5.4	5.808
90	4.4	5.898	2.2	7.594
91	x	X	x	X
93	x	X	x	X
94	x	X	x	X
95	x	X	x	X
98	x	X	x	X
99	x	X	x	X
100	x	X	x	X
101	x	X	x	X
102	3.77778	4.17778	2.66667	5.33556
