# Supplementary material for: Genetic variation in offspring indirectly influences the quality of maternal behaviour in mice
Source: eLife. 2015 Dec 23;4:e11814. doi: 10.7554/eLife.11814 (PMC4758942; doi:10.7554/eLife.11814)
Supplement: Supplementary file 1: — A) Functional and further details about the genes within the OspIge5.1 QTL for B6 maternal behaviour on day 14, obtained from GeneNetwork, Entrez genes, and Mouse Genome Informatics. Potential candidate genes in this region are Cyp3a16, Cyp3a44, Cyp3a11, Cyp3a25 and Cyp3a41a because of their involvement in steroid hormone biosynthesis. B) Functional and further details about the genes within the MatDge1.1 QTL for BXD nestbuilding on day 6, obtained from GeneNetwork, Entrez genes, and Mouse Genome Informatics. Potential candidate genes in this region include: Hsd17b7, as it is involved in steroid hormone synthesis, and hormonal regulation is needed to initiate nestbuilding behaviour (Gammie et al., 2007; Keisala et al., 2007; Bester-Meredith and Marler, 2012); Pou2f1, Lmx1a and Rgs4 as they are linked to activity related phenotypes; finally, Pbx1 and Ddr2 have been linked to craniofacial morphology, which may affect the ability to make nests (Schneider et al., 2012). C) Functional and further details about the genes within the MatDge10.1 QTL for BXD maternal behaviour on day 6, obtained from GeneNetwork, Entrez genes, and Mouse Genome Informatics. A potential candidate gene is Ifngr1 as it is related to depression-like behaviour, which in turn has been linked to reduced maternal care (Smith et al., 2004; Malkesman et al., 2008). D) Functional and further details about the genes within the OspDge5.1 QTL for BXD offspring solicitation on day 6, obtained from GeneNetwork, Entrez genes, and Mouse Genome Informatics. Cdk5 might be a good candidate as it is involved in several neuronal annotations (e.g. axonogenesis and synaptic transmission), and mutants have no suckling reflex (Ohshima et al., 1996). DOI: http://dx.doi.org/10.7554/eLife.11814.015 [file elife-11814-supp1.xlsx]

## Sheet: OspIge5.1
Gene name (mm9)	Description (mm9)	Chr	Start	nsSNPs all strains	nsSNPs C57BL/6J vs DBA/2J	Expression in BXD Hypothalamus mRNA	Expression in BXD Prefrontal Cortex mRNA	Expression in BXD Pituitary Gland mRNA	Expression in BXD Adrenal Gland mRNA	Expression in BXD Brain mRNA	Expression in BXD Hippocampus mRNA	Expression in BXD Striatum mRNA	Cis regulated in BXD Hypothalamus mRNA	Cis regulated in BXD Prefrontal Cortex mRNA	Cis regulated in BXD Pituitary Gland mRNA	Cis regulated in BXD Adrenal Gland mRNA	Cis regulated in BXD Brain mRNA	Cis regulated in BXD Hippocampus mRNA	Cis regulated in BXD Striatum mRNA	Probeset in BXD Hypothalamus mRNA	Probeset in BXD Prefrontal Cortex mRNA	Probeset in BXD Pituitary Gland mRNA	Probeset in BXD Adrenal Gland mRNA	Probeset in BXD Brain mRNA	Probeset in BXD Hippocampus mRNA	Probeset in BXD Striatum mRNA	Indels in BXD mice (mm9)	GO biological process	KEGG Pathways	Abnormal Phenotypes Reported in mouse models	Specifics of behavioural abnormalities (if found)	Specifics of growth/size/body/weight abnormalities (if found)	Human Disease Models
4930568B11Rik	RIKEN cDNA 4930568B11 gene	5	145.306	0	0																						0
Nptx2	neuronal pentraxin 2	5	145.307	71	18	9.5	5.7	7.9	7.7	9.4	6.7	9	yes(37.4)	yes(52.4)	yes(28.2)	no	no	yes(36.1)	no	10527332	1449960_at	10527332	10527332	NM_016789	1449960_at	6935451	1			behavior	abnormal discrimination learning
							8.4				8.1			yes(20.8)				yes(38.3)			1420720_at				1420720_at					nervous system
Tmem130	transmembrane protein 130	5	145.497	88	0	13.3	10.2	12.3	9.7	12.8	12.2	11	no	no	no	no	yes(11.4)	no	no	10535577	1455148_at	10535577	10535577	NM_177735	1455148_at	6942973	0
Trrap	transformation/transcription domain-associated protein	5	145.53	273	12	10.8		11.2	10.5	9.8		10.4	no		no	no	no		no	10527340		10527340	10527340	NM_001081362		6935463	4	transcription		embryogenesis
						9.6		10	9.3			10.9								10527423		10527423	10527423			6935479		chromatin modification		mortality/aging
																												mitotic cell cycle checkpoint
																												regulation of transcription
Smurf1	SMAD specific E3 ubiquitin protein ligase 1	5	145.637	126	8	9.7	5.8	9.8	9.4	7.6	7.8	9.7	no	no	no	no	no	no	no	10535586	1443393_at	10535586	10535586	NM_029438	1443393_at	6942977	3	protein modification process	Ubiquitin mediated proteolysis	skeleton
							5.5			7.6	6.7			yes(13.9)							1428396_at			NM_001038627	1428396_at			protein ubiquitination during ubiquitin-dependent protein catabolic process	Endocytosis
							7.2				8.9										1428395_at				1428395_at			cell differentiation	TGF-beta signaling pathway
																												negative regulation of ossification
																												protein ubiquitination
AW146299	expressed sequence AW146299	5	145.745	66	0		5				5.8			no				no			1447015_at				1447015_at		0			reproductive
							4.7				6.9										1437754_at				1437754_at					other phenotype - maternal effect
1700018F24Rik	RIKEN cDNA 1700018F24 gene	5	145.804	14	0	6.4	4.3	6.5	6.6	6.3	6.2	4.5	no	no	no	no	no	no	no	10527427	1449923_at	10527427	10527427	NM_027069	1449923_at	6935484	0
							2.9				5.2										1438162_x_at				1438162_x_at
Arpc1a	actin related protein 2/3 complex, subunit 1A	5	145.845	68	7	10.4	10	10.2	10.1	12.3	12.8	11.5	no	no	yes(17.8)	no	no	no	no	10527430	1416079_a_at	10527430	10527430	NM_019767	1416079_a_at	6935486	3	regulation of actin filament polymerization	Fc gamma R-mediated phagocytosis
																													Regulation of actin cytoskeleton
Arpc1b	actin related protein 2/3 complex, subunit 1B	5	145.875	81	0	10.1	6.6	10.3	12.3	8.3	6.4	8.8	no	no	no	no	no	no	no	10527441	1416227_at	10527441	10527441	NM_023142	1416227_at	6935490	0	regulation of actin filament polymerization	Fc gamma R-mediated phagocytosis	growth/size/body		decreased body length
						9.4	6.9	10	12.1		7.7									10604763	1416226_at	10604763	10604763		1416226_at				Regulation of actin cytoskeleton	hematopoietic
																														homeostasis
																														skeleton
Pdap1	PDGFA associated protein 1	5	145.89	72	0	9.4	7.9	9.3	9.4	9.2	10.1		no	no	no	no	no	no		10535629	1434020_at	10535629	10535629	NM_001033313	1434020_at		0	platelet-derived growth factor receptor signaling pathway
							10.2				11.7										1434019_at				1434019_at
Bud31	BUD31 homolog (yeast)	5	145.901	60	0	9	9.6	10	10.1	9.9	11	9.3	no	no	no	no	no	yes(15.0)	no	10527448	1439466_s_at	10527448	10527448	NM_001008705	1439466_s_at	6935496	0
Ptcd1	pentatricopeptide repeat domain 1	5	145.908	86	17	9.1	6.4	9.1	9.5	8.6	7.1	9.3	no	no	no	no	no	no	no	10535637	1425096_a_at	10535637	10535637	NM_133735	1425096_a_at	6942999	4
							6.4				7.9							yes(15.8)			1416391_at				1416391_at
Cpsf4	cleavage and polyadenylation specific factor 4	5	145.928	73	6	9.4	7.2	9.4	9.4	9.1	8.7	8.3	yes(53.5)	yes(30.6)	yes(60.6)	yes(40.7)	yes(18.2)	yes(91.4)	no	10527455	1424469_a_at	10527455	10527455	NM_178576	1424469_a_at	6935498	3
																												mRNA processing
Atp5j2	ATP synthase, H+ transporting, mitochondrial F0 complex, subunit f, isoform 2	5	145.945	14	5	12	6.7	11.4	12	13.9	7.4	9.2	no	no	yes(39.0)	no	no	no	no	10535647	1443495_at	10535647	10535647	NM_020582	1443495_at	6943003	0	ATP metabolic process	Oxidative phosphorylation
							11.7				15.4										1435395_s_at				1435395_s_at			transport	Metabolic pathways
							11.4				14.7										1416269_at				1416269_at			proton transport
																												ion transport
																												ATP biosynthetic process
Zkscan14	zinc finger with KRAB and SCAN domains 14	5	145.956	55	6	8.9		9.5	8.9	8		8.5	no		no	no	no		no	10535653		10535653	10535653	NM_023322		6943004	1	transcription		mortality/aging
																												regulation of transcription
																												regulation of transcription, DNA-dependent
Zkscan5	zinc finger with KRAB and SCAN domains 5	5	145.966	114	32	7.9		8.1	8.1	7.6		7.7	no		no	no	no		no	10527465		10527465	10527465	NM_016683		6935500	5	transcription
										7.1														NM_001167944				regulation of transcription
																												regulation of transcription, DNA-dependent
EG622116	predicted gene, EG622116	5	145.991	2	0																						0
Zfp655	zinc finger protein 655	5	145.993	10	3	8.8	7	9.1	9.4	9.7	8	8.7	no	no	no	no	no	no	no	10527475	1431252_a_at	10527475	10527475	NM_028298	1431252_a_at	6935502	0
							6.5			8.2	8.9							yes(14.1)			1429217_at			NM_001083958	1429217_at
							8.5				9.2										1428341_at				1428341_at
Zfp498	zinc finger protein 498	5	146.044	23	0																						0	transcription
																												regulation of transcription
Gm787	gene model 787, (NCBI)	5	146.047	3	0																						0
Cyp3a57	cytochrome P450, family 3, subfamily a, polypeptide 57	5	146.106	30	3	4.7		4.3	5	6.4			no		no	no	no			10527487		10527487	10527487	NM_001100180			0
Cyp3a16	cytochrome P450, family 3, subfamily a, polypeptide 16	5	146.197	24	3	4.8	2.9	4.2	4.9	6.3	5.6	4.1	no	no	no	no	no	no	no	10535659	1421741_at	10535659	10535659	NM_007820	1421741_at	6943031	1	oxidation reduction	Steroid hormone biosynthesis
																													Linoleic acid metabolism
																													Retinol metabolism
																													Metabolism of xenobiotics by cytochrome P450
																													Drug metabolism - cytochrome P450
																													Drug metabolism - other enzymes
																													Metabolic pathways
Cyp3a41b	cytochrome P450, family 3, subfamily a, polypeptide 41B	5	146.32	0	0					6.3		3.9					no		no					NM_001105159		6943036	0	oxidation reduction
Cyp3a41a	cytochrome P450, family 3, subfamily a, polypeptide 41A	5	146.506	0	0	4.6		4	8.1	6.3			no		no	no	no			10535669		10535669	10535669	NM_017396			0	oxidation reduction	Steroid hormone biosynthesis
						4.8		4.2	6.7	6.3										10535683		10535683	10535683	NM_017396_1					Linoleic acid metabolism
																													Retinol metabolism
																													Metabolism of xenobiotics by cytochrome P450
																													Drug metabolism - cytochrome P450
																													Drug metabolism - other enzymes
																													Metabolic pathways
Cyp3a44	cytochrome P450, family 3, subfamily a, polypeptide 44	5	146.586	17	1	5.5		5.4	6.1	6.3			no		no	no	no			10535698		10535698	10535698	NM_177380			0	oxidation reduction	Steroid hormone biosynthesis
																													Linoleic acid metabolism
																													Retinol metabolism
																													Metabolism of xenobiotics by cytochrome P450
																													Drug metabolism - cytochrome P450
																													Drug metabolism - other enzymes
																													Metabolic pathways
Cyp3a11	cytochrome P450, family 3, subfamily a, polypeptide 11	5	146.666	33	2	4.8	3.2	3.8	6.7	6.4	8.2	4.8	no	no	no	no	no	yes(48.6)	no	10535704	1426064_at	10535704	10535704	NM_007818	1426064_at	6943038	0	oxidation reduction	Steroid hormone biosynthesis
							3.6				5.9							no			1416809_at				1416809_at				Linoleic acid metabolism
																													Retinol metabolism
																													Metabolism of xenobiotics by cytochrome P450
																													Drug metabolism - cytochrome P450
																													Drug metabolism - other enzymes
																													Metabolic pathways
Cyp3a25	cytochrome P450, family 3, subfamily a, polypeptide 25	5	146.789	35	5	4.4	3.4	3.9	6	6.3	5.3	5.4	no	no	no	no	no	no	no	10527494	1424973_at	10527494	10527494	NM_019792	1424973_at	6935519	4	oxidation reduction	Steroid hormone biosynthesis
						5.5		5.7	7.8	6.3										10535714		10535714	10535714	NR_030782					Linoleic acid metabolism
																													Retinol metabolism
																													Metabolism of xenobiotics by cytochrome P450
																													Drug metabolism - cytochrome P450
																													Drug metabolism - other enzymes
																													Metabolic pathways
Cyp3a59	cytochrome P450, family 3, subfamily a, polypeptide 59	5	146.891	41	21					6.3							no							NM_001105160			4
1700001J03Rik	RIKEN cDNA 1700001J03 gene	5	146.994	38	16	6.7		6.9	7	6.5			no		no	no	no			10535720		10535720	10535720	NM_001008547			0
B230303O12Rik	RIKEN cDNA B230303O12 gene	5	147	0	0		4.3				6.3			no				no			1456750_at				1456750_at		1
Rnf6	ring finger protein (C3H2C3 type) 6	5	147.021	90	15	9.7	8.4	10.4	9.9	10.3	9	9.6	no	no	no	no	no	no	no	10535725	1427899_at	10535725	10535725	NM_028774	1427899_at	6943067	2	negative regulation of axon extension
							8.6				10.8										1427898_at				1427898_at			ubiquitin-dependent protein catabolic process
																												positive regulation of transcription, DNA-dependent
Cdk8	cyclin-dependent kinase 8	5	147.043	63	2	10.6	8	10.5	10.9	9.6	9.8	10.4	yes(20.5)	no	no	no	no	no	no	10527508	1460389_at	10527508	10527508	NM_153599	1460389_at	6935524	0	transcription		embryogenesis
							4				7										1444243_at				1444243_at			regulation of transcription		mortality/aging
																												protein amino acid phosphorylation
6030446M11Rik	RIKEN cDNA 6030446M11 gene	5	147.055	0	0																						0
Wasf3	WAS protein family, member 3	5	147.197	64	0	10.9	6.7	9.4	9.6	9.3	6.7	9.9	no	no	no	no	no	no	no	10527516	1425061_at	10527516	10527516	NM_145155	1425061_at	6935534	1		Adherens junction
																													Fc gamma R-mediated phagocytosis
Gpr12	G-protein coupled receptor 12	5	147.394	44	9	8.2	6.1	7.8	6.7	8.3	7.5	10.9	yes(37.7)	yes(30.4)	yes(15.0)	no	no	yes(26.9)	no	10535732	1457729_at	10535732	10535732	NM_008151	1457729_at	6943081	1	signal transduction		adipose
							5			6.8	7.6			yes(23.7)				yes(95.2)			1457702_at			NM_001010941	1457702_at			G-protein coupled receptor protein signaling pathway		growth/size/body
							7.6				9.1			no				no			1449472_at				1449472_at			cellular calcium ion homeostasis		homeostasis
																														liver/biliary
4930573C15Rik	RIKEN cDNA 4930573C15 gene	5	147.518	0	0																						1
Usp12	ubiquitin specific peptidase 12	5	147.546	78	14	8.5	8.5	8.8	8.7	9.8	10.2	9.8	no	no	no	no	no	no	no	10535739	1434483_at	10535739	10535739	NM_011669	1434483_at	6943093	4	ubiquitin-dependent protein catabolic process		homeostasis
							6.1				7.4										1427478_at				1427478_at
							7.1				7.3										1425805_a_at				1425805_a_at
1700041I07Rik	RIKEN cDNA 1700041I07 gene	5	147.607	0	0																						3
Rpl21	ribosomal protein L21	5	147.645	163	90	6.9	3.3	7.2	7.1	7	6.4	8.9	no	no	no	no	yes(15.2)	no	no	10403508	1459002_at	10403508	10403508	NM_019647	1459002_at	6860430	1		Ribosome
						8.8	11.4	8.9	8.7	10.7	15.9	8.2	yes(56.0)	yes(17.6)	yes(24.6)	yes(20.9)	no	yes(40.2)		10400544	1455767_x_at	10400544	10400544	NM_001171893	1455767_x_at	6935555
						4.7	12	4.9	5.2		16.8			yes(33.5)				yes(101.6)		10397528	1429077_x_at	10397528	10397528		1429077_x_at
						8.6	5.9	8.8	8.3		6.6									10395737	1423070_at	10395737	10395737		1423070_at
						5.9		5.4	5.4											10366665		10366665	10366665
						4.1		3.6	3.8											10347216		10347216	10347216
						5.7		5.1	5.4											10352457		10352457	10352457
						5.5		4.8	4.8											10406499		10406499	10406499
						7.2		7.8	7.4											10406939		10406939	10406939
						10.3		10.1	10.1											10410772		10410772	10410772
						10.4		10.7	10.7											10412665		10412665	10412665
						7.7		8.1	7.9											10420986		10420986	10420986
						6.2		6.5	6.2											10440467		10440467	10440467
						9.7		10.2	9.8											10443492		10443492	10443492
						13.3		13.7	13.5											10447139		10447139	10447139
						11.6		12	11.8											10451884		10451884	10451884
						10.4		11.2	10.8											10455338		10455338	10455338
						10.8		11.1	10.9											10493243		10493243	10493243
						8.2		8.4	8.3											10500376		10500376	10500376
						8.1		8.3	8.3											10527530		10527530	10527530
						11.3		11.6	11.5											10543317		10543317	10543317
						10.4		10.4	10.3											10546292		10546292	10546292
						10.4		10.8	10.6											10548246		10548246	10548246
						10.2		10.2	10											10569996		10569996	10569996
						12.3		12.6	12.5											10583448		10583448	10583448
						10.9		10.8	10.7											10584122		10584122	10584122
						11.6		12.1	11.7											10587651		10587651	10587651
						12		12.1	12											10599433		10599433	10599433
						13		13.4	13.2											10607324		10607324	10607324
Rasl11a	RAS-like, family 11, member A	5	147.657	29	7	8		8	8.2	6.9			no		no	no	no			10527538		10527538	10527538	NM_026864			0	signal transduction
																												small GTPase mediated signal transduction
																												positive regulation of transcription from RNA polymerase I promoter

## Sheet: MatDge1.1
Gene name (mm9)	Description (mm9)	Chr	Start	nsSNPs all strains	nsSNPs C57BL/6J vs DBA/2J	Expression in BXD Hypothalamus mRNA	Expression in BXD Prefrontal Cortex mRNA	Expression in BXD Pituitary Gland mRNA	Expression in BXD Adrenal Gland mRNA	Expression in BXD Brain mRNA	Expression in BXD Hippocampus mRNA	Expression in BXD Striatum mRNA	Cis regulated in BXD Hypothalamus mRNA	Cis regulated in BXD Prefrontal Cortex mRNA	Cis regulated in BXD Pituitary Gland mRNA	Cis regulated in BXD Adrenal Gland mRNA	Cis regulated in BXD Brain mRNA	Cis regulated in BXD Hippocampus mRNA	Cis regulated in BXD Striatum mRNA	Probeset in BXD Hypothalamus mRNA	Probeset in BXD Prefrontal Cortex mRNA	Probeset in BXD Pituitary Gland mRNA	Probeset in BXD Adrenal Gland mRNA	Probeset in BXD Brain mRNA	Probeset in BXD Hippocampus mRNA	Probeset in BXD Striatum mRNA	Indels in BXD mice (mm9)	GO biological process	KEGG Pathways	Abnormal Phenotypes Reported in mouse models	Specifics of behavioural abnormalities (if found)	Specifics of growth/size/body/weight abnormalities (if found)	Human Disease Models
Prrx1	paired related homeobox 1	1	165.175	209	122	8.7	3.4	8.4	9.1	6.7	7.4	8.2	no	no	yes(60.4)	no	no	no	yes(20.3)	10359624	1458004_at	10359624	10359624	NM_175686	1458004_at	6763646	16	multicellular organismal development		limbs/digits/tail	aphagia	absent maxillary shelf
							3.4			6.7	5.9							yes(92.9)			1439774_at			NM_011127	1439774_at			regulation of transcription, DNA-dependent		skeleton		maxillary shelf hypoplasia
							4			6.8	6.7							yes(65.8)			1432129_a_at			NM_001025570	1432129_a_at			regulation of transcription		cardiovascular		absent palatine bone horizontal plate
							4.6				6.2										1425527_at				1425527_at			artery morphogenesis		craniofacial		abnormal tooth development
							5.2				7										1425528_at				1425528_at			embryonic limb morphogenesis		growth/size/body		abnormal ameloblast morphology
							4.5				7.3										1425526_a_at				1425526_a_at			cartilage development		homeostasis		growth retardation of incisors
																												embryonic skeletal system morphogenesis		mortality/aging		cleft secondary palate
																												inner ear morphogenesis		respiratory		abnormal palatal shelf fusion at midline
																												middle ear morphogenesis		skeleton		palatal shelf hypoplasia
																												embryonic cranial skeleton morphogenesis		behavior		abnormal tongue morphology
																												palate development		digestive/alimentary		abnormal incisor morphology
																												negative regulation of transcription from RNA polymerase II promoter		embryogenesis		absent incisors
																												positive regulation of mesenchymal cell proliferation		hearing/vestibular/ear		pointed snout
																												positive regulation of smoothened signaling pathway		nervous system		abnormal ear position
																																lowered ear position
																																anotia
																																small ears
																																microcephaly
																																distended abdomen
Scyl1bp1	SCY1-like 1 binding protein 1	1	165.315	80	32																						10
Gm207	gene model 207, (NCBI)	1	165.494	0	0																						0
Kifap3	kinesin-associated protein 3	1	165.71	106	52	10.8	10.7	9.5	8.9	11.9	12.9	11.2	yes(50.6)	yes(57.2)	no	no	yes(33.9)	yes(132.0)	yes(39.1)	10351140	1451783_a_at	10351140	10351140	NM_010629	1451783_a_at	6754666	24	negative regulation of cell proliferation		embryogenesis	weakness	embryonic growth retardation
							5.2				7.1			no				no			1446138_at				1446138_at			protein localization		mortality/aging
							9.5				9.9			yes(24.0)				yes(11.0)			1417181_a_at				1417181_a_at			Rho protein signal transduction		nervous system
																												positive regulation of calcium-dependent cell-cell adhesion		cardiovascular
																												microtubule-based process		craniofacial
																														growth/size/body
																														homeostasis
																														limbs/digits/tail
																														vision/eye
																														behavior
																														cellular
																														endocrine/exocrine
																														hematopoietic
																														immune
																														integument
																														liver/biliary
																														muscle
																														respiratory
Scyl3	SCY1-like 3 (S. cerevisiae)	1	165.86	140	78	7.2	7.6	7.6	7.5	8.5	9.6	9.4	no	no	no	no	no	yes(61.8)	no	10359648	1452960_at	10359648	10359648	NM_028776	1452960_at	6754669	16	protein amino acid phosphorylation
						9.3	4.4	9.6	9.7		7.3	7			yes(18.8)	yes(30.0)		no	yes(21.4)	10351163	1446655_at	10351163	10351163		1446655_at	6763682
							6.9				7.7							yes(17.3)			1428918_at				1428918_at
BC055324	cDNA sequence BC055324	1	165.884	95	30					6.7							no							NM_201364			7			skeleton
																														mortality/aging
2810422O20Rik	RIKEN cDNA 2810422O20 gene	1	165.925	39	25					7.2		7.5					no		yes(45.6)					NM_027279		6754671	1	protein amino acid methylation
Sele	selectin, endothelial cell	1	165.978	148	87	7.2	3.6	7.4	7.9	6.3	5.7	6.5	no	no	no	yes(21.3)	no	no	no	10351182	1421712_at	10351182	10351182	NM_011345	1421712_at	6754680	2	cell adhesion	Cell adhesion molecules (CAMs)	behavior	abnormal pilomotor reflex	weight loss
																												positive regulation of leukocyte migration		growth/size/body	tremors
																												inflammatory response		hematopoietic	hypoactivity
																														immune	head tilt
																														vision/eye	spinning
																														cellular
Sell	selectin, lymphocyte	1	165.992	70	28	6.6	4.6	6.8	7.6	6.3	5.9	6.1	no	no	no	no	no	no	no	10351197	1419480_at	10351197	10351197	NM_011346	1419480_at	6754681	4	response to ATP	Cell adhesion molecules (CAMs)	hematopoietic			Diabetes Mellitus, Insulin-Dependent; IDDM 222100
							5			6.3	8.3										1419481_at			NM_001164059	1419481_at			cell adhesion		immune
																														endocrine/exocrine
																														cellular
																														tumorigenesis
																														homeostasis
Selp	selectin, platelet	1	166.054	240	148	6.6	4.7	6.5	6.8	6.4	6.1	6.3	no	no	no	no	no	no	no	10351206	1449906_at	10351206	10351206	NM_011347	1449906_at	6754690	15	regulation of cellular extravasation	Cell adhesion molecules (CAMs)	behavior	abnormal pilomotor reflex	weight loss
							3				5.3										1440173_x_at				1440173_x_at			inflammatory response		cellular	tremors
							4.8				6.8										1420558_at				1420558_at			cell adhesion		growth/size/body	hypoactivity
																												heterophilic cell-cell adhesion		hematopoietic	head tilt
																												positive regulation of platelet activation		immune	spinning
																												cell-cell adhesion		liver/biliary
																												positive regulation of cell adhesion		skeleton
																												blood vessel morphogenesis		vision/eye
																												leukocyte migration		cardiovascular
																												leukocyte cell-cell adhesion		homeostasis
																												leukocyte tethering or rolling		integument
																												positive regulation of leukocyte migration
																												cellular response to interleukin-6
F5	coagulation factor V	1	166.082	236	127	6.6	3.6	6.5	7.7	6.8	7.3	6.3	no	no	no	no	no	no	no	10351224	1449269_at	10351224	10351224	NM_007976	1449269_at	6754691	24	cell adhesion	Complement and coagulation cascades	cardiovascular	lethargy
							3.2				7										1418907_at				1418907_at			oxidation reduction		embryogenesis
																												blood circulation		mortality/aging
																												blood coagulation		behavior
																														homeostasis
																														integument
																														liver/biliary
Slc19a2	solute carrier family 19 (thiamine transporter), member 2	1	166.179	121	51	9.5	5.7	8.4	9.3	8	6.9	8.2	no	yes(51.9)	yes(37.5)	yes(14.2)	yes(14.2)	yes(152.9)	no	10351259	1441315_s_at	10351259	10351259	NM_054087	1441315_s_at	6754696	4	thiamin transport		endocrine/exocrine	ataxia		Thiamine-Responsive Megaloblastic Anemia Syndrome; TRMA 249270
							5.2				6.6			no				yes(44.5)			1426117_a_at				1426117_a_at					hearing/vestibular/ear
							7.3				8.1							yes(137.2)			1417902_at				1417902_at					hematopoietic
																														mortality/aging
																														nervous system
																														reproductive
																														behavior
																														homeostasis
																														immune
4930455F23Rik	RIKEN cDNA 4930455F23 gene	1	166.206	35	19	8.6	7.4	9.2	8.3	8.7	8.9	9.5	no	no	no	no	no	yes(68.3)	no	10351269	1435052_at	10351269	10351269	NM_029115	1435052_at	6754700	3
Blzf1	basic leucine zipper nuclear factor 1	1	166.22	141	62	9.1	4.4	10.3	9.5	7.1	6.9	9.8	no	no	yes(38.4)	no	yes(18.3)	no	yes(18.3)	10359677	1442164_at	10359677	10359677	NM_025505	1442164_at	6763695	6	vesicle-mediated transport		limbs/digits/tail
							7.2			6.9	8.8						no	yes(12.1)			1418973_at			NM_001160209	1418973_at			transport		skeleton
							7.4			7.1	8.1										1418974_at			NM_001160208	1418974_at			protein transport
																												Golgi organization
																												Golgi to plasma membrane protein transport
Nme7	non-metastatic cells 7, protein expressed in	1	166.238	25	9	8.9	3.3	9.6	9.1	7.4	6.9	9.9	no	no	yes(50.5)	no	no	no	no	10351277	1438874_at	10351277	10351277	NM_178071	1438874_at	6754701	40	nucleotide metabolic process	Purine metabolism	cellular		situs inversus
							8			7.6	8.9							yes(22.2)			1418217_at			NM_138314	1418217_at			UTP biosynthetic process	Pyrimidine metabolism	craniofacial
																												CTP biosynthetic process	Metabolic pathways	growth/size/body
																												GTP biosynthetic process		nervous system
																														respiratory
																														skeleton
Atp1b1	ATPase, Na+/K+ transporting, beta 1 polypeptide	1	166.367	33	22	13.5	5.7	12.8	11.9	16	7.7	12.9	no	no	no	no	no	no	no	10359689	1455949_at	10359689	10359689	NM_009721	1455949_at	6763706	5	transport	Cardiac muscle contraction	cardiovascular
							12.3				16.6			yes(11.5)				yes(24.7)			1451152_a_at				1451152_a_at			ion transport	Aldosterone-regulated sodium reabsorption	homeostasis
							13				16.6							yes(56.4)			1439036_a_at				1439036_a_at			response to hypoxia	Proximal tubule bicarbonate reclamation	mortality/aging
							6.4				7.1										1437157_at				1437157_at			ATP biosynthetic process		muscle
							12.3				16.9										1423890_x_at				1423890_x_at			potassium ion transport
							12.1				15.8										1418453_a_at				1418453_a_at			sodium ion transport
																												metal ion transport
D630023O14Rik	RIKEN cDNA D630023O14 gene	1	166.506	0	0																						1
Dpt	dermatopontin	1	166.727	55	31	6.1	4.6	5.7	10.2	6.4	6.8	5.8	no	no	no	no	no	no	no	10351293	1418511_at	10351293	10351293	NM_019759	1418511_at	6754735	7	cell adhesion		adipose		increased total body fat amount
																												negative regulation of cell proliferation		growth/size/body
																												collagen fibril organization		integument
																														vision/eye
LOC433374	hypothetical gene supported by AK042927	1	166.793	0	0																						3
Xcl1	chemokine (C motif) ligand 1	1	166.862	14	6	7	3.6	7	7.4	6.3	6.7	6.5	no	no	no	no	no	no	no	10359697	1419412_at	10359697	10359697	NM_008510	1419412_at	6763731	2	chemotaxis	Cytokine-cytokine receptor interaction	cardiovascular
																												immune response	Chemokine signaling pathway	digestive/alimentary
																												release of sequestered calcium ion into cytosol		endocrine/exocrine
																														hematopoietic
																														immune
																														liver/biliary
																														vision/eye
1700029M03Rik	RIKEN cDNA 1700029M03 gene	1	166.891	0	0		3.1				6.7			no				no			1440794_x_at				1440794_x_at		0
							3.1				6.7										1440793_at				1440793_at
4930568G15Rik	RIKEN cDNA 4930568G15 gene	1	166.997	0	0		3.8				6.2			no				no			1430884_at				1430884_at		12
Tbx19	T-box 19	1	167.068	120	77	7.6	5.7	10.6	6.8	6.3	7.6	6.7	no	no	no	no	no	no	no	10359701	1422086_at	10359701	10359701	NM_032005	1422086_at	6763748	10	pituitary gland development		endocrine/exocrine		abnormal water content	Acth Deficiency, Isolated; IAD 201400
							4.3				5.6										1422085_at				1422085_at			regulation of transcription, DNA-dependent		growth/size/body
																												regulation of cell proliferation		homeostasis
																												transcription		integument
																												cell fate commitment		nervous system
																												regulation of transcription		pigmentation
																												positive regulation of transcription from RNA polymerase II promoter
Sft2d2	SFT2 domain containing 2	1	167.104	332	161	9.8	6	10.3	10.6	8	7.3	9.2	yes(41.6)	no	yes(42.6)	yes(22.9)	yes(32.8)	yes(58.7)	yes(41.1)	10359713	1435142_at	10359713	10359713	NM_145512	1435142_at	6763752	4	protein transport
							8.2				10							yes(46.0)			1435141_at				1435141_at			transport
							5.5				6.4							yes(38.0)			1425027_s_at				1425027_s_at
Tiprl	TIP41, TOR signalling pathway regulator-like (S. cerevisiae)	1	167.142	49	17	9.7	8.8	9.8	9.7	8.9	10.3	9.4	no	no	no	no	no	no	no	10359723	1451587_a_at	10359723	10359723	NM_145513	1451587_a_at	6763754	7
							9.1				10.9										1433912_at				1433912_at
Gpr161	G protein-coupled receptor 161	1	167.226	42	20	8.5		7.3	7.5	7.7			yes(51.3)		no	no	yes(16.5)			10351298		10351298	10351298	NM_001081126			13	G-protein coupled receptor protein signaling pathway		craniofacial	hindlimb paralysis
																												multicellular organismal development		embryogenesis
																												signal transduction		limbs/digits/tail
																														mortality/aging
																														nervous system
																														behavior
																														integument
																														pigmentation
																														vision/eye
Iqwd1	IQ motif and WD repeats 1	1	167.26	61	30		7.9				10.7			no				no			1453312_at				1453312_at		26	positive regulation of transcription from RNA polymerase II promoter
Brp44	brain protein 44	1	167.391	94	34	8.7	10.7	8.4	8.5	11	13.7	9.1	yes(27.5)	no	yes(32.8)	no	no	yes(92.7)	no	10351304	1423833_a_at	10351304	10351304	NM_027430	1423833_a_at	6754776	3
Adcy10	adenylate cyclase 10	1	167.415	189	100	6.2		5.6	5.9	6.4		5.6	no		no	no	no		no	10351310		10351310	10351310	NM_173029		6754777	22	intracellular signaling cascade	Purine metabolism	cardiovascular
																												spermatogenesis		cellular
																												cyclic nucleotide biosynthetic process		homeostasis
																												cAMP biosynthetic process		reproductive
																												positive regulation of apoptosis
Mpzl1	myelin protein zero-like 1	1	167.522	59	16	10.6	7.3	10.4	10.4	8.2	8.6	9.8	no	no	no	no	no	yes(24.6)	no	10359754	1428168_at	10359754	10359754	NM_001083897	1428168_at	6763777	25		Cell adhesion molecules (CAMs)
							5.6			8.2	8.7							no			1428167_a_at			NM_001001880	1428167_a_at
Rcsd1	RCSD domain containing 1	1	167.579	98	46	7.2		7.2	8.1	6.8		7.5	no		yes(20.4)	no	no		no	10359762		10359762	10359762	NM_178593		6763787	15
										6.8														NM_001038846
1700084P21Rik	RIKEN cDNA 1700084P21 gene	1	167.6	0	0		4.4				6.9			no				no			1431343_at				1431343_at		0
A130040G06Rik	RIKEN cDNA A130040G06 gene	1	167.637	0	0																						0
Creg1	cellular repressor of E1A-stimulated genes 1	1	167.694	125	59	9.6	5.3	10.3	10.4	9.3	6.5	8.8	yes(68.3)	no	yes(50.4)	yes(24.3)	no	no	no	10351347	1444380_at	10351347	10351347	NM_011804	1444380_at	6754798	3	regulation of transcription, DNA-dependent
							7.6				9			yes(28.4)				yes(106.9)			1415948_at				1415948_at			regulation of growth
							7.6				8.9							yes(17.6)			1415947_at				1415947_at
Cd247	CD247 antigen	1	167.719	286	92	6.9		7.1	7.2	6.3		6.7	no		no	no	no		no	10351353		10351353	10351353	NM_031162		6754799	31	cell surface receptor linked signaling pathway	Natural killer cell mediated cytotoxicity	mortality/aging
										6.3														NM_001113394				T cell receptor signaling pathway	T cell receptor signaling pathway	hematopoietic
										6.3														NM_001113393						immune
										6.3														NM_001113392						endocrine/exocrine
										6.3														NM_001113391						nervous system
																														cellular
A430104F18Rik	RIKEN cDNA A430104F18 gene	1	167.802	65	18																						1
Pou2f1	POU domain, class 2, transcription factor 1	1	167.806	48	25	9.6	5.9	9.5	9.1	6.8	6.7	9	yes(11.6)	no	no	no	no	no	no	10359770	1427835_at	10359770	10359770	NM_198934	1427835_at	6763810	24	transcription		mortality/aging	lethargy	decreased embryo size
							6.8			6.7	7.6			yes(30.2)				yes(21.4)			1427695_a_at			NM_198933	1427695_a_at			regulation of transcription		embryogenesis		decreased body weight
							6.9			6.9	7.9			yes(36.4)				yes(89.5)			1419716_a_at			NM_198932	1419716_a_at			regulation of transcription, DNA-dependent		growth/size/body
										7.1														NM_011137				negative regulation of transcription		hematopoietic
																												positive regulation of transcription from RNA polymerase II promoter		integument
																												lens induction in camera-type eye		liver/biliary
																												olfactory placode formation		vision/eye
																														behavior/neurological
																														craniofacial
																														endocrine/exocrine glands
A830054O07Rik	RIKEN cDNA A830054O07 gene	1	167.814	0	0																						2
A630006J10Rik	RIKEN cDNA A630006J10 gene	1	167.929	0	0																						0
Dusp27	dual specificity phosphatase 27 (putative)	1	168.028	129	75	6.8		6.5	6.7	6.3			no		no	no	no			10359793		10359793	10359793	NM_001160049			13	dephosphorylation
										6.3														NM_001033344				protein amino acid dephosphorylation
Gpa33	glycoprotein A33 (transmembrane)	1	168.061	85	39	7.2	4.2	7.8	7.5	6.4	6.8	6.8	yes(18.5)	no	yes(72.3)	no	no	no	yes(29.9)	10351368	1454247_a_at	10351368	10351368	NM_021610	1454247_a_at	6754830	18
							5.3				7.5										1419330_a_at				1419330_a_at
Mael	maelstrom homolog (Drosophila)	1	168.132	11	5	6.2		5.7	5.8	6.5		5.3	no		no	no	no		no	10359801		10359801	10359801	NM_175296		6763840	9	DNA methylation during gametogenesis		cellular
																												piRNA metabolic process		endocrine/exocrine
																												gene silencing by RNA		reproductive
																												negative regulation of apoptosis
																												negative regulation of gene expression
																												regulation of organ growth
																												meiosis
																												cell differentiation
																												multicellular organismal development
																												cell morphogenesis
																												meiotic prophase I
																												spermatogenesis
																												response to DNA damage stimulus
																												negative regulation of transcription from RNA polymerase II promoter
																												fertilization
																												male meiosis
																												synapsis
5330438I03Rik	RIKEN cDNA 5330438I03 gene	1	168.144	0	0																						1
D1Ertd471e	DNA segment, Chr 1, ERATO Doi 471, expressed	1	168.153	0	0		8.4				9.2			no				yes(87.7)			1436221_at				1436221_at		0			homeostasis
																														cellular
																														endocrine/exocrine
Tada1l	transcriptional adaptor 1 (HFI1 homolog, yeast) like	1	168.309	181	89		8				9.4			yes(19.0)				yes(30.7)			1424427_at				1424427_at		4	transcription
																												regulation of transcription
EG226601	predicted gene, EG226601	1	168.321	0	0																						0
Pogk	pogo transposable element with KRAB domain	1	168.324	263	151	8.9	7.9	8.8	8.8	8.8	9.4	8.6	yes(17.9)	yes(44.0)	no	no	no	yes(135.4)	no	10359816	1447864_s_at	10359816	10359816	NM_175170	1447864_s_at	6763853	5
										7.2														NM_001142948				multicellular organismal development
																												regulation of transcription, DNA-dependent
																												regulation of transcription
EG226604	predicted gene, EG226604	1	168.559	92	23																						6
Fmo9	flavin containing monooxygenase 9	1	168.592	75	46	6.4		6.3	6.5	6.3		5.6	no		no	no	no		no	10359837		10359837	10359837	NM_172844		6763864	2
C030014K22Rik	RIKEN cDNA C030014K22 gene	1	168.932	96	56		4.5				7.6			no				no			1453861_at				1453861_at		26
							6.6				8.3										1440242_at				1440242_at
Uck2	uridine-cytidine kinase 2	1	169.156	22	17	10.1	5.8	11.1	10.6	8.7	8.5	9.7	no	no	no	yes(15.0)	yes(11.1)	yes(13.4)	no	10359851	1457980_x_at	10359851	10359851	NM_030724	1457980_x_at	6763894	31		Pyrimidine metabolism
						7.9	7.1	8.6	8.2		7.5			yes(30.6)		no		yes(32.0)		10359849	1448604_at	10359849	10359849		1448604_at				Drug metabolism - other enzymes
							4.3				6.4			yes(30.5)				yes(84.4)			1441858_at				1441858_at				Metabolic pathways
							6.2				6.9			yes(18.4)				no			1440680_at				1440680_at
							7.2				8.8							yes(21.9)			1439740_s_at				1439740_s_at
							5.7				7.6							yes(93.5)			1439741_x_at				1439741_x_at
							7.3				8.2							yes(63.4)			1426909_at				1426909_at
							5				5.9										1417137_at				1417137_at
Tmco1	transmembrane and coiled-coil domains 1	1	169.239	154	36	9.8	9.4	10	10.8	8.6	11.2	9.2	no	no	yes(65.1)	yes(22.9)	no	yes(30.4)	no	10351404	1423759_a_at	10351404	10351404	NM_001039483	1423759_a_at	6754892	5
Aldh9a1	aldehyde dehydrogenase 9, subfamily A1	1	169.28	88	40	10.6	7.4	11.4	11.4	8.7	8.7	9.1	yes(19.6)	yes(28.9)	yes(25.4)	no	no	yes(111.9)	yes(28.4)	10351414	1437398_a_at	10351414	10351414	NM_019993	1437398_a_at	6754893	2	oxidation reduction	Glycolysis / Gluconeogenesis
							7.8				9.7			yes(26.3)				yes(81.1)			1436689_a_at				1436689_a_at			metabolic process	Ascorbate and aldarate metabolism
																												carnitine metabolic process	Fatty acid metabolism
																													Valine, leucine and isoleucine degradation
																													Lysine degradation
																													Arginine and proline metabolism
																													Histidine metabolism
																													Tryptophan metabolism
																													beta-Alanine metabolism
																													Glycerolipid metabolism
																													Pyruvate metabolism
																													Propanoate metabolism
																													Butanoate metabolism
																													Limonene and pinene degradation
																													Metabolic pathways
Mgst3	microsomal glutathione S-transferase 3	1	169.303	12	3	9	5.2	7.6	9.4	12.8	7.1	10.5	yes(13.6)	no	yes(33.7)	yes(14.0)	no	yes(23.8)	yes(12.4)	10359861	1450563_at	10359861	10359861	NM_025569	1450563_at	6763903	9		Glutathione metabolism
							10.6				11.8			yes(52.3)				yes(84.3)			1448300_at				1448300_at				Metabolism of xenobiotics by cytochrome P450
																													Drug metabolism - cytochrome P450
Lrrc52	leucine rich repeat containing 52	1	169.376	16	3	7.1		8.2	7.1	6.3		6.1	no		yes(29.7)	no	no		no	10359867		10359867	10359867	NM_001013382		6763912	7
Rxrg	retinoid X receptor gamma	1	169.528	49	31	9.9	6.5	11	7.6	8.2	7.1	11.3	yes(18.0)	no	no	no	no	yes(18.8)	yes(15.7)	10351430	1418782_at	10351430	10351430	NM_009107	1418782_at	6754900	13	transcription	PPAR signaling pathway	behavior	catalepsy
										6.5														NM_001159731				regulation of transcription	Adipocytokine signaling pathway	mortality/aging
																												regulation of transcription, DNA-dependent	Pathways in cancer	muscle
																												retinoic acid receptor signaling pathway	Thyroid cancer	nervous system
																												positive regulation of transcription from RNA polymerase II promoter	Small cell lung cancer
																													Non-small cell lung cancer
Lmx1a	LIM homeobox transcription factor 1 alpha	1	169.62	105	56	7.9	4.2	7.3	7.4	6.5	6.7	6.8	no	no	no	no	no	no	no	10351443	1421554_at	10351443	10351443	NM_033652	1421554_at	6754909	36	transcription		behavior	absent pinna reflex	decreased body size
																												central nervous system development		hearing/vestibular/ear	impaired righting response
																												regulation of transcription		integument	abnormal placing response
																												negative regulation of neuron differentiation		nervous system	hyperactivity
																												regulation of transcription, DNA-dependent		pigmentation	head tossing
																												brain development		reproductive	abnormal motor coordination/ balance
																												cerebellum development		limbs/digits/tail	ataxia
																												dentate gyrus development		integument	circling
																												hippocampus development		growth/size/body	bidirectional circling
																												central nervous system neuron differentiation		cellular	altered righting response
																												regulation of gene expression		craniofacial	abnormal resting posture
																												multicellular organismal development		embryogenesis
																												regulation of cell growth		mortality/aging
																												axon guidance		skeleton
																												neuron differentiation
Pbx1	pre B-cell leukemia transcription factor 1	1	170.049	47	17	11	4.2	11	11.4	7.5	6.4	10.9	no	no	no	no	no	no	no	10359870	1458853_at	10359870	10359870	NM_008783	1458853_at	6763937	10	sex differentiation		behavior	hunched posture	abnormal embryonic growth/weight/body size
							6.4				8.1			yes(19.5)				yes(30.5)			1449542_at				1449542_at			cell differentiation		cardiovascular		abnormal maxillary shelf morphology
							6.5				9.2							yes(30.9)			1447096_at				1447096_at			transcription		endocrine/exocrine		abnormal nasal capsule morphology
							3.8				6.8							yes(25.4)			1442846_at				1442846_at			positive regulation of cell proliferation		growth/size/body		cleft upper lip
							6.4				8.4							yes(17.0)			1440954_at				1440954_at			steroid biosynthetic process		homeostasis		cleft palate
							7.8				10										1440037_at				1440037_at			adrenal gland development		integument		palatal shelf hypoplasia
							5.8				8										1430183_at				1430183_at			urogenital system development		limbs/digits/tail		tongue hypoplasia
							8.5				10.3										1428647_at				1428647_at			regulation of transcription		hematopoietic		short snout
							7.9				9.6										1428646_at				1428646_at			branching involved in ureteric bud morphogenesis		immune		abnormal outer ear morphology
							6.9				8.5										1425383_a_at				1425383_a_at			organ morphogenesis		skeleton		decreased body size
																												thymus development		craniofacial		weight loss
																												positive regulation of transcription from RNA polymerase II promoter		digestive/alimentary		abnormal embryonic growth/weight/body size
																												regulation of transcription, DNA-dependent		embryogenesis
																												spleen development		hearing/vestibular/ear
																												embryonic organ development		liver/biliary
																												anterior/posterior pattern formation		mortality/aging
																												embryonic skeletal system development		muscle
																												regulation of ossification		renal/urinary
																												regulation of cell proliferation		reproductive
																												proximal/distal pattern formation		respiratory
																												embryonic hemopoiesis		skeleton
																												embryonic limb morphogenesis
																												negative regulation of neuron differentiation
4833414E09Rik	RIKEN cDNA 4833414E09 gene	1	170.256	0	0		5.1				6.1			no				no			1435582_at				1435582_at		0
1700063I16Rik	RIKEN cDNA 1700063I16 gene	1	170.605	0	0																						0
EG383613	predicted gene, EG383613	1	171.293	0	0																						0
Nuf2	NUF2, NDC80 kinetochore complex component, homolog (S. cerevisiae)	1	171.428	84	0	6.2		6.2	6.6	6.6		6.9	no		no	no	no		no	10359890		10359890	10359890	NM_023284		6763972	0	cell cycle
																												mitosis
																												cell division
																												attachment of spindle microtubules to kinetochore
Rgs5	regulator of G-protein signaling 5	1	171.586	62	0	7.9	8.3	9.2	8.7	10.5	9.8	9.9	no	no	no	no	no	no	no	10351463	1420942_s_at	10351463	10351463	NM_009063	1420942_s_at	6755054	0	G-protein coupled receptor protein signaling pathway		cardiovascular		decreased total body fat amount
						10.2	8.2	11.3	10.4		9.4	9.6								10351455	1420941_at	10351455	10351455		1420941_at	6755055		negative regulation of signal transduction		adipose		slow postnatal weight gain
							7.7				8.4										1420940_x_at				1420940_x_at			signal transduction		growth/size/body
							10				12										1417466_at				1417466_at					hematopoietic
																														immune
Rgs4	regulator of G-protein signaling 4	1	171.672	65	0	10.1	10.3	9.1	9.2	13.8	8.9	12.6	no	no	no	no	no	no	no	10359908	1448285_at	10359908	10359908	NM_009062	1448285_at	6763991	0	negative regulation of signal transduction		cardiovascular	impaired behavioral response to morphine	decreased body weight
							10.7				10.5										1416287_at				1416287_at			G-protein coupled receptor protein signaling pathway		homeostasis	decreased behavioral withdrawal response	increased total body fat amount
							11.6				12.1										1416286_at				1416286_at					mortality/aging	impaired coordination
																														renal/urinary	abnormal touch/ nociception
																														behavior	decreased aggression towards mice
																														growth/size/body	impaired conditioned place preference behavior
																														integument	abnormal object recognition memory
																														adipose	increased vertical activity
																														cellular	hyperactivity
																														hematopoietic
																														immune
1700084C01Rik	RIKEN cDNA 1700084C01 gene	1	171.859	52	0					8.7							no							NM_001033185			1
Hsd17b7	hydroxysteroid (17-beta) dehydrogenase 7	1	171.88	186	0	9.1	7.9	8.1	9.8	8.5	7.7	8.7	no	no	no	no	no	no	no	10359917	1457248_x_at	10359917	10359917	NM_010476	1457248_x_at	6764007	0	steroid biosynthetic process	Steroid biosynthesis	nervous system		decreased embryo size
							7.2				7.9										1448865_at				1448865_at			oxidation reduction	Steroid hormone biosynthesis	skeleton
							4.2				6.2										1440057_at				1440057_at			lipid biosynthetic process	Metabolic pathways	cardiovascular
							6.4				7.5										1417871_at				1417871_at			cholesterol biosynthetic process		embryogenesis
																												metabolic process		growth/size/body
																												signal transduction		homeostasis
																												female pregnancy		craniofacial
																														muscle
																														mortality/aging
3110045C21Rik	RIKEN cDNA 3110045C21 gene	1	171.9	53	0		5				6.3			no				no			1430401_at				1430401_at		0
Ddr2	discoidin domain receptor family, member 2	1	171.902	222	0	8.5	5.8	8.5	9.8	7.3	6.8	7.2	no	no	no	no	no	yes(20.5)	no	10359929	1455688_at	10359929	10359929	NM_022563	1455688_at	6764010	0	protein amino acid phosphorylation		craniofacial		shortened head	Dwarfism, Levi Type
							6.4				8.1							no			1422738_at				1422738_at			cell adhesion		growth/size/body		decreased body size
																												positive regulation of cell proliferation		adipose		decreased percent body fat
																												transmembrane receptor protein tyrosine kinase signaling pathway		cellular		short snout
																														endocrine/exocrine		increased lean body mass
																														homeostasis		slow postnatal weight gain
																														mortality/aging		disproportionate dwarf
																														nervous system		decreased body weight
																														reproductive		postnatal growth retardation
																														skeleton
																														vision/eye

## Sheet: MatDge10.1
Gene name (mm9)	Description (mm9)	Chr	Start	nsSNPs all strains	nsSNPs C57BL/6J vs DBA/2J	Expression in BXD Hypothalamus mRNA	Expression in BXD Prefrontal Cortex mRNA	Expression in BXD Pituitary Gland mRNA	Expression in BXD Adrenal Gland mRNA	Expression in BXD Brain mRNA	Expression in BXD Hippocampus mRNA	Expression in BXD Striatum mRNA	Cis regulated in BXD Hypothalamus mRNA	Cis regulated in BXD Prefrontal Cortex mRNA	Cis regulated in BXD Pituitary Gland mRNA	Cis regulated in BXD Adrenal Gland mRNA	Cis regulated in BXD Brain mRNA	Cis regulated in BXD Hippocampus mRNA	Cis regulated in BXD Striatum mRNA	Probeset in BXD Hypothalamus mRNA	Probeset in BXD Prefrontal Cortex mRNA	Probeset in BXD Pituitary Gland mRNA	Probeset in BXD Adrenal Gland mRNA	Probeset in BXD Brain mRNA	Probeset in BXD Hippocampus mRNA	Probeset in BXD Striatum mRNA	Indels in BXD mice (mm9)	GO biological process	KEGG Pathways	Abnormal Phenotypes Reported in mouse models	Specifics of behavioural abnormalities (if found)	Specifics of growth/size/body/weight abnormalities (if found)	Human Disease Models
Tnfaip3	tumor necrosis factor, alpha-induced protein 3	10	18.7207	180	27	7.3	5.8	7.7	8.1	6.6	6.2	7.7	no	no	no	no	no	yes(14.1)	no	10368144	1450829_at	10368144	10368144	NM_009397	1450829_at	6772417	3	apoptosis	NOD-like receptor signaling pathway	hematopoietic		increased susceptibility to weight loss
							5.9			6.6	7.2							yes(23.1)			1433699_at			NM_001166402	1433699_at					immune		decreased body size
																														cardiovascular		cachexia
																														cellular
																														digestive/alimentary
																														endocrine/exocrine
																														growth/size/body
																														homeostasis
																														liver/biliary
																														mortality/aging
																														integument
																														renal/urinary
																														skeleton
1700124M09Rik	RIKEN cDNA 1700124M09 gene	10	18.8063	0	0																						0
Olig3	oligodendrocyte transcription factor 3	10	19.0763	37	10	5.7	4.1	5.6	5.7	6.4	6.2	6.4	no	no	no	no	no	no	no	10361895	1421728_at	10361895	10361895	NM_053008	1421728_at	6766333	0	transcription		cellular
																												regulation of transcription		homeostasis
																														mortality/aging
																														nervous system
																														respiratory
Ifngr1	interferon gamma receptor 1	10	19.3118	92	18	9.7	7	9.8	10.2	8.1	8.1	9.1	no	no	no	no	no	no	no	10361897	1448167_at	10361897	10361897	NM_010511	1448167_at	6766350	1	blood coagulation	Cytokine-cytokine receptor interaction	immune	abnormal depression-related behavior
							3				6.3										1443602_at				1443602_at				Jak-STAT signaling pathway	mortality/aging	abnormal pain threshold
																													Natural killer cell mediated cytotoxicity	homeostasis
																													Leishmania infection	tumorigenesis
																														behavior
																														cardiovascular
																														cellular
																														embryogenesis
																														endocrine/exocrine
																														hematopoietic
																														integument
																														liver/biliary
																														nervous system
																														reproductive
																														skeleton
Il22ra2	interleukin 22 receptor, alpha 2	10	19.3418	63	15	6.2	3.6	6.2	6.5	6.3	6.6	5.8	no	no	no	no	no	no	no	10361906	1437665_at	10361906	10361906	NM_178258	1437665_at	6766351	0	blood coagulation	Cytokine-cytokine receptor interaction	digestive/alimentary		increased total body fat amount
																												regulation of tyrosine phosphorylation of Stat3 protein	Jak-STAT signaling pathway	homeostasis		decreased lean body mass
																														immune
																														tumorigenesis
Il20ra	interleukin 20 receptor, alpha	10	19.4324	66	2	6.1		6.7	7.8	6.5		7.9	no		no	no	no		no	10361918		10361918	10361918	NM_172786		6766353	4	blood coagulation	Cytokine-cytokine receptor interaction	adipose
																													Jak-STAT signaling pathway	growth/size/body
																														hematopoietic
																														immune
																														cellular
																														skeleton
Slc35d3	solute carrier family 35, member D3	10	19.5677	51	0	7.8	3.2	7	9	6.8	6.3	10.1	no	no	no	no	no	no	no	10368159	1428642_at	10368159	10368159	NM_029529	1428642_at	6772476	0	transport		hematopoietic
																												carbohydrate transport		homeostasis
Pex7	peroxisome biogenesis factor 7	10	19.5803	37	2	9	5.2	9	9.8	8.9	6.2	9.5	no	no	no	no	no	no	no	10368162	1459551_at	10368162	10368162	NM_008822	1459551_at	6772482	1	fatty acid beta-oxidation	Peroxisome	cardiovascular	abnormal eating behavior	decreased birth body size	Rhizomelic Chondrodysplasia Punctata, Type 1; RCDP1
							8.6			7.1	9.4							yes(24.1)			1418988_at			NM_001161825	1418988_at			neuron migration		cellular	dystonia	decreased birth weight
																												endochondral ossification		endocrine/exocrine		increased susceptibility to weight loss
																												protein transport		growth/size/body		decreased body size
																												transport		homeostasis		decreased body weight
																												protein targeting to peroxisome		immune		slow postnatal weight gain
																												protein import into peroxisome matrix		liver/biliary		disproportionate dwarf
																														mortality/aging
																														nervous system
																														reproductive
																														skeleton
																														vision/eye
																														behavior
																														hematopoietic
																														muscle
Map3k5	mitogen-activated protein kinase kinase kinase 5	10	19.6543	149	25	9.7	6.4	9.4	9.6	8.5	7.5	8.7	no	no	no	no	no	no	no	10361926	1458577_at	10361926	10361926	NM_008580	1458577_at	6766368	13	apoptosis	MAPK signaling pathway	cardiovascular
							8.4				8.7							yes(28.9)			1439830_at				1439830_at			protein amino acid phosphorylation	Neurotrophin signaling pathway	cellular
							7.1				8.1							yes(46.2)			1421340_at				1421340_at			activation of MAPK activity	Amyotrophic lateral sclerosis (ALS)	homeostasis
Mtap7	microtubule-associated protein 7	10	19.8687	86	15	9.5	5	9.7	8.8	9.2	6.8	9.9	yes(17.9)	no	no	no	no	no	no	10361956	1446607_at	10361956	10361956	NM_008635	1446607_at	6766372	29	glycosphingolipid metabolic process		endocrine/exocrine
							4.3				6										1432983_at				1432983_at			Leydig cell differentiation		reproductive
							5.3				7.7										1429894_a_at				1429894_a_at			response to osmotic stress		endocrine/exocrine
							8				10.1										1421835_at				1421835_at			Sertoli cell development		immune
							8.6				11.5										1421836_at				1421836_at			cell morphogenesis		reproductive
																												cell proliferation
																												fertilization
																												germ cell development
																												homeostasis of number of cells
																												microtubule bundle formation
																												nucleus organization
																												organ growth
																												response to retinoic acid
																												spermatogenesis
1700026H06Rik	RIKEN cDNA 1700026H06 gene	10	19.8909	0	0		3.7				6.3			no				no			1432984_at				1432984_at		0
4930405J17Rik	RIKEN cDNA 4930405J17 gene	10	19.9191	0	0																						2
4933406P04Rik	RIKEN cDNA 4933406P04 gene	10	20.0303	31	2	5.6	4.4	6.5	5.7		6		no	no	no	no		no		10368173	1430093_at	10368173	10368173		1430093_at		0
Bclaf1	BCL2-associated transcription factor 1	10	20.0323	72	9	10.6	8.8	10.7	10.3	9.4	10.4	10.1	no	yes(21.5)	no	no	no	yes(46.6)	no	10361979	1438089_a_at	10361979	10361979	NM_153787	1438089_a_at	6766380	6	transcription		behavior	absent gastric milk in neonates	decreased body size
							8.2			9.4	9.1			yes(18.6)				yes(30.9)			1436023_at			NM_001025392	1436023_at			regulation of transcription		cellular
							3			9	5.8			no				no			1430581_at			NM_001025393	1430581_at			negative regulation of transcription		growth/size/body
							9.2				11.6			yes(10.7)							1428845_at				1428845_at			positive regulation of apoptosis		hematopoietic
							7.2				10										1428844_a_at				1428844_a_at					immune
																														limbs/digits/tail
																														mortality/aging
																														respiratory
2610016C23Rik	RIKEN cDNA 2610016C23 gene	10	20.0676	62	14		5.2				6.4			no				no			1432013_a_at				1432013_a_at		1
Pde7b	phosphodiesterase 7B	10	20.1195	437	6	10.3	3.6	10.5	9.4		7.1	11.9	no	no	no	no		no	no	10368175	1459954_at	10368175	10368175		1459954_at	6772550	2	signal transduction	Purine metabolism
							5.4				7.3										1458141_at				1458141_at
							4.8				5.6										1450213_at				1450213_at
							9				9.1										1445539_at				1445539_at
							4.1				6.2										1432251_at				1432251_at
							5.4				6.1										1421353_at				1421353_at
							6.7				7.1										1419990_at				1419990_at
4930403O15Rik	RIKEN cDNA 4930403O15 gene	10	20.2351	30	0																						0
F730021E23Rik	RIKEN cDNA F730021E23 gene	10	20.2678	11	0	6.6		7.3	6.5				no		no	no				10362003		10362003	10362003				0
Ahi1	Abelson helper integration site	10	20.6724	98	0	12.7	9.8	11.2	9.4	12	12.5	11	no	no	no	no	no	no	no	10362005	1455177_at	10362005	10362005	NM_026203	1455177_at	6766409	0			behavior	abnormal locomotor behavior	slow postnatal weight gain	Joubert Syndrome 3; JBTS3
							6.9				8.3										1439083_at				1439083_at					growth/size/body	abnormal locomotor activation	decreased body size
																														cellular		decreased body weight
																														mortality/aging
																														nervous system
																														vision/eye
Myb	myeloblastosis oncogene	10	20.8447	88	2	7.7	3.1	8.2	7.5	6.5	6.6	7.5	no	no	no	no	no	yes(14.0)	no	10368199	1450194_a_at	10368199	10368199	NM_010848	1450194_a_at	6772594	0	transcription		embryogenesis		decreased body size	Myelofibrosis
							3.1				6							no			1422734_a_at				1422734_a_at			regulation of transcription		hematopoietic
							3.5				6.4										1421317_x_at				1421317_x_at			G1/S transition of mitotic cell cycle		immune
																												regulation of transcription, DNA-dependent		cellular
																												calcium ion transport		endocrine/exocrine
																												in utero embryonic development		mortality/aging
																												embryonic gut development		growth/size/body
																												regulation of gene expression		liver/biliary
																														mortality/aging
																														cardiovascular
																														integument
Hbs1l	Hbs1-like (S. cerevisiae)	10	21.0158	29	0	9.5	6.9	10.3	9.9	7.7	7.8	10	no	no	no	no	no	no	no	10363903	1453604_a_at	10363903	10363903	NM_019702	1453604_a_at	6766422	0	translation		reproductive
						10.2	4.4	10.7	10.6	8.3	6.1									10362036	1440050_at	10362036	10362036	NM_001145209	1440050_at
							8.7			7.7	9.8										1421029_a_at			NM_001042593	1421029_a_at
4930455C13Rik	RIKEN cDNA 4930455C13 gene	10	21.0389	3	0		6				7.3			no				no			1431634_at				1431634_at		0
Aldh8a1	aldehyde dehydrogenase 8 family, member A1	10	21.0971	151	0	5.7	5.5	5.8	7.8	6.4	6.5		no	no	no	no	no	no		10362052	1427336_at	10362052	10362052	NM_178713	1427336_at		0	oxidation reduction
							3.9				6.6										1427337_at				1427337_at			metabolic process
																												retinal metabolic process
																												9-cis-retinoic acid biosynthetic process
1700021A07Rik	RIKEN cDNA 1700021A07 gene	10	21.1393	16	0	7.3	5.7	7.5	7.6		7.7		no	yes(11.5)	no	no		no		10362062	1453964_at	10362062	10362062		1453964_at		0
1700020N01Rik	RIKEN cDNA 1700020N01 gene	10	21.313	21	0	6.8	3.3	7	6.8	6.3	6.3	6.6	no	no	no	no	no	no	no	10362064	1429868_at	10362064	10362064	NR_027968	1429868_at	6766443	0
EG432436	predicted gene, EG432436	10	21.4107	84	0																						0
LOC628133	hypothetical protein LOC628133	10	21.5503	87	0																						0
Sgk1	serum/glucocorticoid regulated kinase 1	10	21.7145	35	0	9.3	8.8	9	9.8	8.1	12	10.1	no	no	no	no	no	no	no	10362073	1416041_at	10362073	10362073	NM_011361	1416041_at	6766455	0	apoptosis	Aldosterone-regulated sodium reabsorption	homeostasis		increased susceptibility to weight loss
										6.6														NM_001161850				response to stress		renal/urinary
										6.5														NM_001161849				cellular response to insulin stimulus		growth/size/body
										6.7														NM_001161847				positive regulation of sodium ion transport
																												regulation of protein localization
																												cellular sodium ion homeostasis
																												microtubule depolymerization
																												long-term memory
																												response to DNA damage stimulus
																												visual learning
																												protein amino acid phosphorylation
																												peptidyl-serine phosphorylation
																												positive regulation of cell growth
																												negative regulation of microtubule polymerization
																												negative regulation of apoptosis
																												glucocorticoid mediated signaling pathway
																												neuron projection morphogenesis
																												positive regulation of dendrite morphogenesis
																												regulation of cell cycle
4930444G20Rik	RIKEN cDNA 4930444G20 gene	10	21.7861	17	0	7.5		7.2	7.3	6.6			no		no	no	no			10353731		10353731	10353731	NM_053264			0
						7.6		7.7	7.9											10368222		10368222	10368222
						6.9		6.5	6.4											10353729		10353729	10353729
						7.3		7.7	7.4											10439016		10439016	10439016
						7		7.2	6.9											10606069		10606069	10606069
E030030I06Rik	RIKEN cDNA E030030I06 gene	10	21.8329	32	0	7.6		7.9	8				no	no	no					10368224		10368224	10368224				0

## Sheet: OspDge5.1
Gene name (mm9)	Description (mm9)	Chr	Start	nsSNPs all strains	nsSNPs C57BL/6J vs DBA/2J	Expression in BXD Hypothalamus mRNA	Expression in BXD Prefrontal Cortex mRNA	Expression in BXD Pituitary Gland mRNA	Expression in BXD Adrenal Gland mRNA	Expression in BXD Brain mRNA	Expression in BXD Hippocampus mRNA	Expression in BXD Striatum mRNA	Cis regulated in BXD Hypothalamus mRNA	Cis regulated in BXD Prefrontal Cortex mRNA	Cis regulated in BXD Pituitary Gland mRNA	Cis regulated in BXD Adrenal Gland mRNA	Cis regulated in BXD Brain mRNA	Cis regulated in BXD Hippocampus mRNA	Cis regulated in BXD Striatum mRNA	Probeset in BXD Hypothalamus mRNA	Probeset in BXD Prefrontal Cortex mRNA	Probeset in BXD Pituitary Gland mRNA	Probeset in BXD Adrenal Gland mRNA	Probeset in BXD Brain mRNA	Probeset in BXD Hippocampus mRNA	Probeset in BXD Striatum mRNA	Indels in BXD mice (mm9)	GO biological process	KEGG Pathways	Abnormal Phenotypes Reported in mouse models	Specifics of behavioural abnormalities (if found)	Specifics of growth/size/body/weight abnormalities (if found)	Human Disease Models
Gnai1	guanine nucleotide binding protein (G protein), alpha inhibiting 1	5	17.771	52	1	11.7	11.3	9.4	10.2	12.4	14.1		no	no	no	no	no	no		10528227	1454959_s_at	10528227	10528227	NM_010305	1454959_s_at		0	signal transduction	Chemokine signaling pathway	behavior	abnormal learning/memory/conditioning
							10.6				12.7										1434440_at				1434440_at			G-protein coupled receptor protein signaling pathway	Axon guidance	nervous system	abnormal associative learning
							8.2				9.6										1427510_at				1427510_at			negative regulation of synaptic transmission	Tight junction		abnormal passive avoidance behavior
																													Gap junction		abnormal contextual conditioning behavior
																													Leukocyte transendothelial migration		abnormal long term object recognition memory
																													Long-term depression
																													Progesterone-mediated oocyte maturation
																													Melanogenesis
4921504A21Rik	RIKEN cDNA 4921504A21 gene	5	18.7091	33	0																						0
Magi2	membrane associated guanylate kinase, WW and PDZ domain containing 2	5	19.4137	88	0	10.6	9.7	9.6	8.2	7.7	11.2	10.4	no	no	no	no	yes(14.8)	no	no	10519913	1454855_at	10519913	10519913	NM_015823	1454855_at	6929018	2	intracellular signaling cascade	Tight junction	nervous system
						7.8	5.8	7.3	6.9	8	8.6						no			10519942	1446524_at	10519942	10519942	NM_001170746	1446524_at			signal transduction		mortality/aging
							6			7.6	8.6										1441220_at			NM_001170745	1441220_at
							6.3				9.2										1440807_at				1440807_at
							8.4				10										1420532_at				1420532_at
1110060G06Rik	RIKEN cDNA 1110060G06 gene	5	20.2342	0	0																						0
Phtf2	putative homeodomain transcription factor 2	5	20.2645	163	1	8.5	3.2	9.6	8.5	8	6.7	8.5	no	no	no	no	no	no	no	10528238	1444559_at	10528238	10528238	NM_172992	1444559_at	6936560	0	transcription		hematopoietic
							6				6.8										1437637_at				1437637_at			regulation of transcription		homeostasis
							5.7				7.6										1437067_at				1437067_at
Tmem60	transmembrane protein 60	5	20.3883	11	0	8.9	8.7	8.6	8.6	9	9.8	10.6	no	no	no	no	no	no	no	10519945	1428000_at	10519945	10519945	NM_177601	1428000_at	6929098	0
Rsbn1l	round spermatid basic protein 1-like	5	20.3988	93	0	7.3		7.5	7.7	8.7			no		no	no	no			10519949		10519949	10519949	NM_001080977			1
A630072M18Rik	RIKEN cDNA A630072M18 gene	5	20.4648	0	0	9.5		9.8	9.8	6.9	6.9						no	no		10528257		10528257	10528257	NR_030699	1427081_at		0
Ptpn12	protein tyrosine phosphatase, non-receptor type 12	5	20.4925	55	3		6.2			9.4	6.7	9.3		no			no	no	no		1427081_at			NM_011203	1459459_at	6936564	0	protein amino acid dephosphorylation		cardiovascular		embryonic growth retardation
						9.8	3.3	9.1	10		10.1		no	no	no	no		yes(12.4)		10528268	1459459_at	10528268	10528268		1455105_at			dephosphorylation		embryogenesis
							8.6				9.8										1455105_at				1450479_x_at					growth/size/body
							8.3				8.4										1450479_x_at				1450478_a_at					liver/biliary
							7.3				7.3										1450478_a_at				1439705_at					mortality/aging
							5.6				10.3										1439705_at				1422045_a_at					nervous system
							8.8														1422045_a_at									hematopoietic
																														immune
A530088I07Rik	RIKEN cDNA A530088I07 gene	5	20.6921	139	51																						13
4930528G09Rik	RIKEN cDNA 4930528G09 gene	5	20.8237	174	49		2.9				6			no				no			1453904_at				1453904_at		9
Fgl2	fibrinogen-like protein 2	5	20.8785	98	46	7.5	3.8	7.2	9.1	6.9	6.7	6.3	no	no	no	no	no	no	no	10519983	1421855_at	10519983	10519983	NM_008013	1421855_at	6929119	0	cytolysis		cardiovascular
							3.8				6.2										1421854_at				1421854_at			signal transduction		homeostasis
																														immune
																														mortality/aging
AI847670	expressed sequence AI847670	5	20.9307	146	3																						0
Fbxl13	F-box and leucine-rich repeat protein 13	5	20.9897	180	37	6.9	4.1	6.3	6.3	6.4	6.1	6	no	no	yes(15.7)	no	no	no	no	10528310	1445131_at	10528310	10528310	NM_177076	1445131_at	6936573	8
Lrrc17	leucine rich repeat containing 17	5	21.0493	63	3	7.2	4.2	8.4	8.7	6.4	6.7	6.7	no	no	no	no	no	no	no	10519998	1454076_at	10519998	10519998	NM_028977	1454076_at	6929132	0	ossification
							3.4				6.3										1429679_at				1429679_at			negative regulation of osteoclast differentiation
																												osteoblast proliferation
																												osteoblast differentiation
																												bone marrow development
Armc10	armadillo repeat containing 10	5	21.1518	152	57	8.6		8.5	8.7	8.8		10.3	no		yes(18.2)	no	no		no	10520003		10520003	10520003	NM_026034		6929144	5	regulation of growth
Napepld	N-acyl phosphatidylethanolamine phospholipase D	5	21.1687	181	34	10.4		9.7	11.7	7.9		7.4	yes(21.4)		yes(93.1)	no	no		no	10528332		10528332	10528332	NM_178728		6936575	7	lipid metabolic process		homeostasis
																												phospholipid catabolic process		nervous system
9530071P10Rik	RIKEN cDNA 9530071P10 gene	5	21.2021	0	0		5				7.1			no				no			1432742_at				1432742_at		1
Pmpcb	peptidase (mitochondrial processing) beta	5	21.243	179	26	9.9	8.1	9.8	11	10	10.1	9.9	no	no	no	no	no	no	no	10520010	1433729_x_at	10520010	10520010	NM_028431	1433729_x_at	6929149	0	proteolysis		mortality/aging
Dnajc2	DnaJ (Hsp40) homolog, subfamily C, member 2	5	21.2631	175	53	8.3	3.8	8.1	8.6	8.8	6.5	5.8	yes(42.8)	yes(19.0)	yes(31.8)	yes(13.8)	yes(13.7)	yes(33.4)	no	10528340	1454219_at	10528340	10528340	NM_009584	1454219_at	6936584	6	regulation of transcription
							3.5				7.6	9.8		no				no			1425910_at				1425910_at	6936585		negative regulation of cell growth
							8				9.2			yes(20.2)				yes(21.4)			1417657_s_at				1417657_s_at			DNA replication
																												G2 phase of mitotic cell cycle
Psmc2	proteasome (prosome, macropain) 26S subunit, ATPase 2	5	21.2911	143	31	9.6	4.5	9.7	9.9	11	7.4	10.2	no	no	no	no	no	no	no	10520025	1443307_at	10520025	10520025	NM_011188	1443307_at	6929152	5	protein catabolic process	Proteasome
							10.8				13.7							yes(60.2)			1435859_x_at				1435859_x_at
							10.5				12.2										1426611_at				1426611_at
Slc26a5	solute carrier family 26, member 5	5	21.3165	81	3	6.5		6.2	6	6.4		7	no		yes(11.1)	no	no		no	10528360		10528360	10528360	NM_030727		6936587	3	regulation of membrane potential		growth/size/body		decreased body weight
																												sensory perception of sound		hearing/vestibular/ear
																												regulation of cell shape		nervous system
																												sulfate transport
																												transmembrane transport
																												transport
Reln	reelin	5	21.3903	717	96	9.7	4.2	9.7	8	10.9	6.5	10.8	no	no	no	no	yes(14.0)	no	no	10528385	1458020_at	10528385	10528385	NM_011261	1458020_at	6936589	47	positive regulation of protein kinase activity	Focal adhesion	behavior	tremors	decreased body size
							9.2				10.6										1449465_at				1449465_at			multicellular organismal development	ECM-receptor interaction	growth/size/body	ataxia	decreased body weight
																												cell adhesion		mortality/aging	impaired righting response	slow postnatal weight gain
																												spinal cord patterning		nervous system	impaired balance	postnatal growth retardation
																												response to pain		cellular	hypoactivity
																												thyroid hormone metabolic process		digestive/alimentary	abnormal gait
																												cerebral cortex tangential migration		integument	impaired coordination
																												brain development		reproductive	abnormal motor capabilities/coordination/movement
																												locomotory behavior
																												axon guidance
																												central nervous system development
																												cell morphogenesis involved in differentiation
																												glial cell differentiation
																												neuron migration
																												positive regulation of small GTPase mediated signal transduction
																												peptidyl-tyrosine phosphorylation
Orc5l	origin recognition complex, subunit 5-like (S. cerevisiae)	5	21.9923	66	6	8.9	3.6	9.7	9.2	8.3	6.8		no	no	no	no	no	no		10528457	1441601_at	10528457	10528457	NM_011959	1441601_at		3	DNA replication	Cell cycle
							7.5				8.2										1415830_at				1415830_at
1700030G06Rik	RIKEN cDNA 1700030G06 gene	5	22.0562	158	13																						8
6030443J06Rik	RIKEN cDNA 6030443J06 gene	5	22.0563	134	13																						0
A930003O13Rik	RIKEN cDNA A930003O13 gene	5	22.2447	4	0					6.5							no							NR_027362			1
Lhfpl3	lipoma HMGIC fusion partner-like 3	5	22.252	141	62	10.6	4.3	10.5	8.6	8	7.1		no	no	yes(17.9)	no	no	yes(14.6)		10520043	1429592_at	10520043	10520043	NM_029990	1429592_at		96
										8.2														NM_001081231
A930037G07Rik	RIKEN cDNA A930037G07 gene	5	22.2872	0	0																						0
5031425E22Rik	RIKEN cDNA 5031425E22 gene	5	22.8881	27	8	8.6	3.2	9.5	9.1		6.4		no	no	no	no		no		10528482	1456719_at	10528482	10528482		1456719_at		20
							5.2				5.8			yes(24.3)				yes(43.9)			1454102_at				1454102_at
							3				5.5			yes(16.4)							1440738_at				1440738_at
							7.7				7.3										1432059_x_at				1432059_x_at
4930580E04Rik	RIKEN cDNA 4930580E04 gene	5	22.8929	0	0																						1
2900022P04Rik	RIKEN cDNA 2900022P04 gene	5	22.9101	0	0																						1
BC050254	cDNA sequence BC050254	5	22.9376	41	20		7.4				7.9			no				no			1435794_at				1435794_at		1
Mll5	myeloid/lymphoid or mixed-lineage leukemia 5	5	22.9931	0	0	10.9	8.2	11.3	11.1	10	10.1		no	no	no	no	no	no		10520048	1439107_a_at	10520048	10520048	NM_026984	1439107_a_at		0	cell cycle arrest		endocrine/exocrine		decreased body size
							9.1				10.9			yes(11.4)				yes(91.1)			1439108_at				1439108_at			transcription		growth/size/body		decreased body weight
							9.4				11.1										1434704_at				1434704_at			chromatin modification		hematopoietic		decreased total body fat amount
							5.1				6.9										1432602_at				1432602_at			regulation of transcription		homeostasis		decreased body weight
							3.6				6.7										1432601_at				1432601_at			cell cycle		immune		postnatal growth retardation
							9.2				11.2										1427236_a_at				1427236_a_at			erythrocyte differentiation		mortality/aging
																												neutrophil mediated immunity		reproductive
																												neutrophil activation		adipose
																												DNA methylation		cellular
Srpk2	serine/arginine-rich protein specific kinase 2	5	23.0092	105	42	11	3.7	10.7	10	11.2	7.4	11.3	yes(13.6)	yes(41.7)	no	no	no	yes(48.3)	no	10528484	1455650_at	10528484	10528484	NM_009274	1455650_at	6936679	30	cell differentiation
							9				9.5			no				no			1448603_at				1448603_at			protein amino acid phosphorylation
							5.6				7.5			yes(28.5)				yes(175.9)			1442241_at				1442241_at			mRNA processing
							4.3				6.3			yes(14.8)				yes(33.3)			1440080_at				1440080_at			protein kinase cascade
							8.3				10.2			yes(12.5)				yes(84.5)			1435746_at				1435746_at			spliceosome assembly
							5.9				7.8							yes(74.3)			1431372_at				1431372_at			RNA splicing
							9.1				10.7										1417135_at				1417135_at
							8.4				10.5										1417136_s_at				1417136_s_at
							9.6				11.2										1417134_at				1417134_at
BC023969	cDNA sequence BC023969	5	23.2041	0	0																						0
AI506816	expressed sequence AI506816	5	23.2052	0	0					6.8							yes(29.4)							NR_015554			0
Pus7	pseudouridylate synthase 7 homolog (S. cerevisiae)	5	23.2465	171	57	8.6		9	8.9	8.1		8.1	no		yes(17.1)	no	no		no	10528507		10528507	10528507	NM_178403		6936690	19
Rint1	RAD50 interactor 1	5	23.2936	310	139	9.1		10	9.2	8.9		8.6	yes(18.7)		no	no	yes(27.4)		yes(28.6)	10520080		10520080	10520080	NM_177323		6929252	9	transport		homeostasis
																												protein transport		mortality/aging
																												cell cycle		embryogenesis
																												vesicle-mediated transport		integument
																														reproductive
																														tumorigenesis
4933427G23Rik	RIKEN cDNA 4933427G23 gene	5	23.3214	153	57	9.2		10.5	10.1				no		no	no				10528519		10528519	10528519				7
Tomm7	translocase of outer mitochondrial membrane 7 homolog (yeast)	5	23.3448	30	6	9.9	6.9	9.8	10	10.3	10.8	12.7	no	no	yes(10.7)	no	no	no	no	10528523	1434732_x_at	10528523	10528523	NM_025394	1434732_x_at	6936693	1	transport
							6				7.3			yes(31.7)				yes(149.3)			1428216_s_at				1428216_s_at			protein transport
							9.4				12.4										1428215_x_at				1428215_x_at			intracellular protein transport
							9.2				11.6										1428214_at				1428214_at
2700038G22Rik	RIKEN cDNA 2700038G22 gene	5	23.3564	73	25		4.9				6.3			yes(60.6)				yes(100.6)			1459698_at				1459698_at		1
							5.6				7.7			no				yes(50.7)			1453745_at				1453745_at
							4				6.6							no			1446579_at				1446579_at
1700052K07Rik	RIKEN cDNA 1700052K07 gene	5	23.3639	0	0																						2
Drctnnb1a	down-regulated by Ctnnb1, a	5	23.4668	191	90		6.9				9.6			no				yes(19.4)			1450724_at				1450724_at		26
Klhl7	kelch-like 7 (Drosophila)	5	23.6064	53	21	10.8	3.7	10.5	9.7	10.6	6.5	10.2	yes(30.2)	no	yes(67.5)	no	no	no	no	10520096	1459477_at	10520096	10520096	NM_026448	1459477_at	6929260	18
							8.6			8.6	11.4			yes(16.6)				yes(152.2)			1452660_s_at			NM_001161800	1452660_s_at
							8.1				9.8							yes(36.7)			1444956_at				1444956_at
							9				10.4										1428091_at				1428091_at
							3				6.7										1420073_s_at				1420073_s_at
Nupl2	nucleoporin like 2	5	23.6708	122	50	8.5	5.6	8.7	8.5	7.5	7.2	8.5	yes(27.5)	yes(12.0)	yes(39.1)	no	no	yes(65.4)	no	10520111	1456773_at	10520111	10520111	NM_153092	1456773_at	6929279	5	transport
							6.1				7			no				no			1424889_at				1424889_at			protein transport
																												mRNA transport
																												transmembrane transport
Kcnh2	potassium voltage-gated channel, subfamily H (eag-related), member 2	5	23.8254	60	20	10.3	7.6	10.3	9.5	8.5	7.7	8.7	no	no	yes(28.9)	yes(16.8)	no	yes(16.3)	no	10528548	1449544_a_at	10528548	10528548	NM_013569	1449544_a_at	6936719	9	transport		cardiovascular		decreased embryo size
																												ion transport		craniofacial
																												regulation of transcription, DNA-dependent		embryogenesis
																												signal transduction		growth/size/body
																												two-component signal transduction system (phosphorelay)		homeostasis
																												transmembrane transport		mortality/aging
																												potassium ion transport		muscle
																												regulation of membrane potential
																												protein heterooligomerization
Nos3	nitric oxide synthase 3, endothelial cell	5	23.8706	160	69	8	7	7.9	8.4	6.9	7.8	8.1	yes(11.7)	no	no	no	yes(15.8)	no	no	10520126	1422622_at	10520126	10520126	NM_008713	1422622_at	6929292	9	negative regulation of cell proliferation	Arginine and proline metabolism	cardiovascular	increased anxiety-related response	decreased body weight	Hypertension, Essential
																												lung development	Metabolic pathways	cellular	abnormal learning/memory/conditioning	increased body weight	Alveolar Capillary Dysplasia with Misalignment of Pulmonary Veins
																												angiogenesis	Calcium signaling pathway	endocrine/exocrine	abnormal long term object recognition memory	fetal growth retardation
																												positive regulation of angiogenesis	VEGF signaling pathway	growth/size/body	abnormal spatial learning	increased susceptibility to weight gain
																												nitric oxide biosynthetic process		hematopoietic	hypoactivity
																												signal transduction		homeostasis	polydipsia
																												ovulation from ovarian follicle		immune	abnormal associative learning
																												negative regulation of smooth muscle cell proliferation		mortality/aging	abnormal seizure response to inducing agent
																												oxidation reduction		muscle
																												blood vessel remodeling		nervous system
																												smooth muscle hyperplasia		renal/urinary
																												negative regulation of muscle hyperplasia		reproductive
																												regulation of blood vessel size		respiratory
																												negative regulation of hydrolase activity		skeleton
																												negative regulation of calcium ion transport		limbs/digits/tail
																												negative regulation of potassium ion transport		adipose
																												regulation of sodium ion transport		liver/biliary
																												lipopolysaccharide-mediated signaling pathway		behavior
																														vision/eye
Atg9b	ATG9 autophagy related 9 homolog B (S. cerevisiae)	5	23.89	79	38	8.4		8	7.7	7.1		7.5	no		yes(33.3)	no	no		no	10528567		10528567	10528567	NM_001002897		6936723	3	autophagy
																												autophagic vacuole assembly
Abcb8	ATP-binding cassette, sub-family B (MDR/TAP), member 8	5	23.9	114	60	9.4	6.5	9.3	9.3	9.4	8.2	9.8	yes(39.3)	no	yes(75.8)	yes(24.3)	yes(20.0)	yes(36.9)	yes(23.7)	10520154	1423713_at	10520154	10520154	NM_029020	1423713_at	6929298	12	transport	ABC transporters	cardiovascular
							8.4				9.3			yes(14.3)				yes(11.4)			1422015_a_at				1422015_a_at					homeostasis
																												transmembrane transport		muscle
Accn3	amiloride-sensitive cation channel 3	5	23.9193	42	17	7.1	3.7	7	7.1	6.4	6.2	6.7	no	no	no	no	no	no	no	10520173	1439983_a_at	10520173	10520173	NM_183000	1439983_a_at	6929300	0	transport		cellular	behavior/neurological phenotype
																												ion transport		nervous system	hyperresponsive to tactile stimuli
																												sodium ion transport		vision/eye	decreased chemical nociceptive threshold
																												response to mechanical stimulus		behavior	abnormal mechanical nociception
																												cation transport		integument	decreased thermal nociceptive threshold
																												response to heat		hearing/vestibular/ear	hyperalgesia
																												response to acid		homeostasis
																												detection of chemical stimulus involved in sensory perception
																												detection of chemical stimulus involved in sensory perception of pain
																												detection of mechanical stimulus involved in sensory perception of pain
																												detection of temperature stimulus involved in sensory perception of pain
																												detection of mechanical stimulus involved in sensory perception
																												detection of temperature stimulus involved in sensory perception
Cdk5	cyclin-dependent kinase 5	5	23.9241	21	6	11.3	9.9	10.7	10.1		10.7	11.4	yes(11.9)	no	yes(35.6)	no		no	no	10528583	1450674_at	10528583	10528583		1450674_at	6936725	1	cell cycle	Axon guidance	behavior	abnormal contextual conditioning behavior
							8				8.3										1422590_at				1422590_at			cell division	Alzheimer's disease	nervous system	abnormal spatial learning
																												cell-matrix adhesion		homeostasis	no suckling reflex
																												cell migration		integument	unresponsive to tactile stimuli
																												regulation of cell migration		mortality/aging	weakness
																												axonogenesis		respiratory	abnormal locomotor behavior
																												neuron migration
																												sensory perception of pain
																												apoptosis
																												negative regulation of cell cycle
																												skeletal muscle tissue development
																												intracellular protein transport
																												associative learning
																												response to cocaine
																												synaptic transmission, glutamatergic
																												exocytosis
																												protein amino acid phosphorylation
																												nucleocytoplasmic transport
																												response to wounding
																												peptidyl-serine phosphorylation
																												cortical actin cytoskeleton organization
																												regulated secretory pathway
																												protein amino acid autophosphorylation
																												regulation of synaptic plasticity
																												synaptic vesicle endocytosis
																												positive regulation of protein kinase activity
																												receptor clustering
																												motor axon guidance
																												behavioral response to cocaine
																												forebrain development
																												negative regulation of protein export from nucleus
																												negative regulation of protein ubiquitination
																												visual learning
																												positive regulation of calcium ion-dependent exocytosis
																												neuron differentiation
																												serine phosphorylation of STAT3 protein
																												dendrite morphogenesis
																												central nervous system neuron development
																												cerebellar cortex development
																												cerebellar cortex formation
																												cerebral cortex development
																												cerebellum development
																												hippocampus development
																												layer formation in the cerebral cortex
																												synaptic transmission, dopaminergic
																												neuron projection morphogenesis
																												neuron apoptosis
																												Schwann cell development
																												regulation of postsynaptic membrane potential
																												corpus callosum development
																												telencephalon development
																												negative regulation of synaptic plasticity
																												receptor catabolic process
																												regulation of excitatory postsynaptic membrane potential
Slc4a2	solute carrier family 4 (anion exchanger), member 2	5	23.931	118	48	8.9	6.3	9	9.5		9	8.8	no	no	no	yes(12.6)		no	yes(17.8)	10520187	1416637_at	10520187	10520187		1416637_at	6929301	5	transport		behavior	aphagia	failure of tooth eruption
																												ion transport		craniofacial	ataxia	decreased birth body size
																												chloride transport		digestive/alimentary		postnatal growth retardation
																												anion transport		endocrine/exocrine
																														growth/size/body
																														hearing/vestibular/ear
																														hematopoietic
																														immune
																														mortality/aging
																														skeleton
																														cellular
																														reproductive
Fastk	Fas-activated serine/threonine kinase	5	23.9469	45	19	10.8	8	10.6	10.6	10.6	9.5	10.4	no	yes(27.2)	yes(32.3)	yes(13.4)	no	yes(34.9)	no	10528598	1460635_at	10528598	10528598	NM_023229	1460635_at	6936729	0	apoptosis		homeostasis
																														hematopoietic
																														immune
Tmub1	transmembrane and ubiquitin-like domain containing 1	5	23.9513	25	15	8.6		8.7	8.3	8.7		9.9	no		no	no	no		no	10528610		10528610	10528610	NM_022418		6936730	0			adipose	hyperactivity	decreased total body fat amount
																														behavior	abnormal sleep pattern
																														growth/size/body
																														hematopoietic
																														immune
2310074N15Rik	RIKEN cDNA 2310074N15 gene	5	23.9537	0	0																						0
Centg3	centaurin, gamma 3	5	23.958	38	12		8.7				10.1			no				no			1434032_at				1434032_at		15	regulation of ARF GTPase activity	Endocytosis
							7.8				9.3										1423910_at				1423910_at			signal transduction
																												small GTPase mediated signal transduction
Gbx1	gastrulation brain homeobox 1	5	24.0102	32	11	7.4	5.2	7.4	7.5	6.6	6.7	6.6	no	no	no	no	no	no	no	10528617	1456760_at	10528617	10528617	NM_015739	1456760_at	6936744	10	transcription		behavior	abnormal locomotor behavior
																												regulation of transcription		nervous system	abnormal gait
																												regulation of transcription, DNA-dependent		integument	hypoactivity
																															abnormal gait
																															increased anxiety-related response
																															impaired coordination
																															abnormal locomotor activation
																															increased thermal nociceptive threshold
Asb10	ankyrin repeat and SOCS box-containing protein 10	5	24.0385	66	41	7.2	4.1	6.9	7.2	6.4	6.2	6.7	no	no	no	no	no	no	no	10528622	1441581_at	10528622	10528622	NM_080444	1441581_at	6936745	1	intracellular signaling cascade		hematopoietic
							5.6				6.6										1421466_at				1421466_at
4931409K22Rik	RIKEN cDNA 4931409K22 gene	5	24.0493	48	34	6.3		6.5	6.4	6.4		6	no		no	no	no		no	10528630		10528630	10528630	NM_177676		6936746	4
Abcf2	ATP-binding cassette, sub-family F (GCN20), member 2	5	24.0712	20	13	10.2	5.3	9.7	10	6.3			yes(15.0)	no	yes(17.2)	yes(14.4)				10528648	1427487_at	10528648	10528648	NR_033188			6
							8.8			11.2	7.7	10					no	no	no		1423863_at			NM_013853	1427487_at	6936747
2010209O12Rik	RIKEN cDNA 2010209O12 gene	5	24.0926	60	24						9.6							yes(64.6)							1423863_at		2		Glycosaminoglycan biosynthesis - chondroitin sulfate
																													Metabolic pathways
Smarcd3	SWI/SNF related, matrix associated, actin dependent regulator of chromatin, subfamily d, member 3	5	24.0984	50	21	10.4	6.6	9.2	8.9				yes(32.6)	no	no	no				10528664	1444415_at	10528664	10528664				1	transcription
							9.1				7.4	10.8						no	no		1418467_at				1444415_at	6936750		regulation of transcription
											11.3														1418467_at			chromatin modification
																												nervous system development
																												heart morphogenesis
																												muscle cell differentiation
																												positive regulation of transcription
																												regulation of protein binding
1700022A21Rik	RIKEN cDNA 1700022A21 gene	5	24.1588	0	0	7.9	5.4	7.9	8.1				no	no	no	no				10520247	1453157_at	10520247	10520247				0
Nub1	negative regulator of ubiquitin-like proteins 1	5	24.1916	255	93	11	8.2	10.4	10.3	6.3	7.1		no	no	yes(15.4)	no	no	no		10520250	1452777_a_at	10520250	10520250	NR_003953	1453157_at		10
							8.2			10.4	10	10.9					no	yes(44.2)	no		1452776_a_at			NM_016736	1452777_a_at	6929312
							5.8				8.9							yes(25.9)			1428439_at				1452776_a_at
							7.8				6.1							yes(21.6)			1420535_a_at				1428439_at
Wdr86	WD repeat domain 86	5	24.2181	145	63	7.3		7.5	7.7		9.2		no		yes(13.3)	yes(17.2)		yes(67.7)		10528679		10528679	10528679		1420535_a_at		5
Crygn	crystallin, gamma N	5	24.2568	22	8	7.5	3.8	7.3	7.4	6.8		6	no	no	no	no	no		no	10528686	1425286_at	10528686	10528686	NM_001081441		6936754	2
Rheb	RAS-homolog enriched in brain	5	24.3086	200	122	10.8	11.6	11.2	10.8	6.4	6.5	7.5	no	no	no	no	no	no	no	10528691	1416636_at	10528691	10528691	NM_153076	1425286_at	6936758	25	signal transduction	mTOR signaling pathway	cardiovascular		decreased embryo size
										11	14.2	11.2					no	yes(14.6)	no					NM_053075	1416636_at	6936759		small GTPase mediated signal transduction	Insulin signaling pathway	mortality/aging		embryonic growth retardation
																														muscle		decreased fetal size
																														cellular		fetal growth retardation
																														embryogenesis		postnatal growth retardation
																														growth/size/body
																														homeostasis
																														nervous system
Prkag2	protein kinase, AMP-activated, gamma 2 non-catalytic subunit	5	24.3686	281	102	10.4	5	9.8	9.7	8.4	7.3	9.5	no	yes(17.1)	no	no	no	yes(68.3)	no	10528702	1457885_at	10528702	10528702	NM_145401	1457885_at	6936760	34	fatty acid biosynthetic process	Insulin signaling pathway
							8.7			7.8	11			no				yes(63.7)			1451140_s_at			NM_001170556	1451140_s_at			lipid biosynthetic process	Adipocytokine signaling pathway
							5.7			7.6	7.1							no			1432683_at			NM_001170555	1432683_at			regulation of catalytic activity	Hypertrophic cardiomyopathy (HCM)
							3.6				6.4							yes(48.3)			1431263_at				1431263_at			response to stress
							7.3				9.7										1423832_at				1423832_at
							8.1				10										1423831_at				1423831_at
4933426D04Rik	RIKEN cDNA 4933426D04 gene	5	24.4084	35	0		4				6			no				no			1432407_at				1432407_at		0
2900019A20Rik	RIKEN cDNA 2900019A20 gene	5	24.4092	0	0																						0
1500035N22Rik	RIKEN cDNA 1500035N22 gene	5	24.4917	57	24	8.2	4.2	9.1	7.7		6.8		no	no	no	no		no		10520268	1443995_at	10520268	10520268		1443995_at		4
							6				7.4										1430070_at				1430070_at
2900005J15Rik	RIKEN cDNA 2900005J15 gene	5	24.6068	27	0	7.3	5.1	8.1	7.9	6.8	6.6	7.3	no	no	no	no	no	no	no	10520271	1453655_at	10520271	10520271	NR_027851	1453655_at	6929349	0
